# Supplementary material
Source: PubMed Central journal article supplement (PMC6538457)
Supplement: NIHMS1527011-supplement-Acknowledgment_Form.pdf [file NIHMS1527011-supplement-Acknowledgment_Form.pdf]

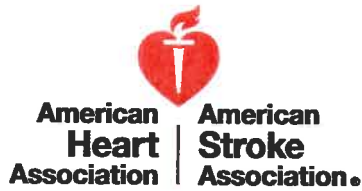

## Acknowledgment Permission Form

---

Journal STROKE

Manuscript Number STROKE/2018/023097R1

First Author LAURA IBANEZ

Title of Work OVERLAP IN THE GENETIC ARCHITECTURE OF STROKE RISK, EARLY NEUROLOGICAL CHANGES AND CARDIOVASCULAR RISK FACTORS

Authors must provide written permission/approval from all individuals mentioned by name in the Acknowledgments section of a submitted manuscript. By signing this form, any and all acknowledged persons therefore state that they have read and approved the mention of their names in the Acknowledgment section of the aforementioned paper.

|           |                                     |           |                                 |      |                   |
|-----------|-------------------------------------|-----------|---------------------------------|------|-------------------|
| Name (1)  | <u>Kathie. A. Mihindukulasuriya</u> | Signature | <u>Kathie Mihindukulasuriya</u> | Date | <u>02/27/2019</u> |
| Name (2)  | _____                               | Signature | _____                           | Date | _____             |
| Name (3)  | _____                               | Signature | _____                           | Date | _____             |
| Name (4)  | _____                               | Signature | _____                           | Date | _____             |
| Name (5)  | _____                               | Signature | _____                           | Date | _____             |
| Name (6)  | _____                               | Signature | _____                           | Date | _____             |
| Name (7)  | _____                               | Signature | _____                           | Date | _____             |
| Name (8)  | _____                               | Signature | _____                           | Date | _____             |
| Name (9)  | _____                               | Signature | _____                           | Date | _____             |
| Name (10) | _____                               | Signature | _____                           | Date | _____             |
| Name (11) | _____                               | Signature | _____                           | Date | _____             |
| Name (12) | _____                               | Signature | _____                           | Date | _____             |
| Name (13) | _____                               | Signature | _____                           | Date | _____             |
| Name (14) | _____                               | Signature | _____                           | Date | _____             |
| Name (15) | _____                               | Signature | _____                           | Date | _____             |
| Name (16) | _____                               | Signature | _____                           | Date | _____             |
| Name (17) | _____                               | Signature | _____                           | Date | _____             |
| Name (18) | _____                               | Signature | _____                           | Date | _____             |
| Name (19) | _____                               | Signature | _____                           | Date | _____             |
| Name (20) | _____                               | Signature | _____                           | Date | _____             |
