# Supplementary material
Source: PubMed Central journal article supplement (PMC6538457)
Supplement: NIHMS1527011-supplement-Slowik_s_coa_form.pdf [file NIHMS1527011-supplement-Slowik_s_coa_form.pdf]

## Change of Authorship Form

---

(Must be completed and signed by ALL authors)

Please check all that apply

New author(s) have been added (in addition to this form, all new authors must complete the copyright transfer agreement and conflict of interest disclosure.

Change in order of authorship.

An author wishes to remove his/her name. An author's name may only be removed his/her own request and a letter signed by the author should accompany this form

Manuscript Number STROKE/2018/023097R1

Manuscript Title OVERLAP IN THE GENETIC ARCHITECTURE OF STROKE RISK, EARLY NEUROLOGICAL CHANGES AND CARDIOVASCULAR RISK FACTORS

### Former Authorship

Please list ALL AUTHORS in the same order as the original submission. For more than 12, use an extra sheet.

#### Print Name

Name (1) Laura Ibanez  
Name (2) Laura Heitsch  
Name (3) Fabiana HG Farias  
Name (4) John Budde  
Name (5) Kristy Bergmann  
Name (6) Rich Davenport

#### Print Name

Name (7) Joseph Bradley  
Name (8) Caty Carrera  
Name (9) Janne Kinnunen  
Name (10) Hanne Sallinen  
Name (11) Daniel Strbian  
Name (12) Agnieszka Slowik

### New Authorship

All authors must sign below agreeing to the changes in authorship. The authorship order must reflect the authorship order of the manuscript.

|                                   |                 |            |
|-----------------------------------|-----------------|------------|
| Name (1) <u>Laura Ibanez</u>      | Signature _____ | Date _____ |
| Name (2) <u>Laura Heitsch</u>     | Signature _____ | Date _____ |
| Name (3) <u>Umber Dube</u>        | Signature _____ | Date _____ |
| Name (4) <u>Fabiana HG Farias</u> | Signature _____ | Date _____ |
| Name (5) <u>John Budde</u>        | Signature _____ | Date _____ |
| Name (6) <u>Kristy Bergmann</u>   | Signature _____ | Date _____ |
| Name (7) <u>Rich Davenport</u>    | Signature _____ | Date _____ |
| Name (8) <u>Joseph Bradley</u>    | Signature _____ | Date _____ |
| Name (9) <u>Caty Carrera</u>      | Signature _____ | Date _____ |
| Name (10) <u>Janne Kinnunen</u>   | Signature _____ | Date _____ |
| Name (11) <u>Hanne Sallinen</u>   | Signature _____ | Date _____ |
| Name (12) <u>Daniel Strbian</u>   | Signature _____ | Date _____ |

Please scan and email to [stroke@strokeahajournal.org](mailto:stroke@strokeahajournal.org).

## Change of Authorship Form

(Must be completed and signed by ALL authors)

Please check all that apply

New author(s) have been added (in addition to this form, all new authors must complete the copyright transfer agreement and conflict of interest disclosure.

Change in order of authorship.

An author wishes to remove his/her name. An author's name may only be removed his/her own request and a letter signed by the author should accompany this form

Manuscript Number STROKE/2018/023097R1

Manuscript Title OVERLAP IN THE GENETIC ARCHITECTURE OF STROKE RISK, EARLY NEUROLOGICAL CHANGES AND CARDIOVASCULAR RISK FACTORS

### Former Authorship

Please list ALL AUTHORS in the same order as the original submission. For more than 12, use an extra sheet.

#### Print Name

Name (1) Israel Fernandez  
Name (2) Joan Montaner  
Name (3) Jin-Moo Lee  
Name (4) Carlos Cruchaga  
Name (5) \_\_\_\_\_  
Name (6) \_\_\_\_\_

#### Print Name

Name (7) \_\_\_\_\_  
Name (8) \_\_\_\_\_  
Name (9) \_\_\_\_\_  
Name (10) \_\_\_\_\_  
Name (11) \_\_\_\_\_  
Name (12) \_\_\_\_\_

### New Authorship

All authors must sign below agreeing to the changes in authorship. The authorship order must reflect the authorship order of the manuscript.

|                                  |                                                                                                       |                          |
|----------------------------------|-------------------------------------------------------------------------------------------------------|--------------------------|
| Name (1) <u>Agnieszka Slowik</u> | Signature <u>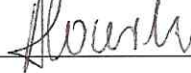</u> | Date <u>4 March 2019</u> |
| Name (2) <u>Israel Fernandez</u> | Signature _____                                                                                       | Date _____               |
| Name (3) <u>Joan Montaner</u>    | Signature _____                                                                                       | Date _____               |
| Name (4) <u>Jin-Moo Lee</u>      | Signature _____                                                                                       | Date _____               |
| Name (5) <u>Carlos Cruchaga</u>  | Signature _____                                                                                       | Date _____               |
| Name (6) _____                   | Signature _____                                                                                       | Date _____               |
| Name (7) _____                   | Signature _____                                                                                       | Date _____               |
| Name (8) _____                   | Signature _____                                                                                       | Date _____               |
| Name (9) _____                   | Signature _____                                                                                       | Date _____               |
| Name (10) _____                  | Signature _____                                                                                       | Date _____               |
| Name (11) _____                  | Signature _____                                                                                       | Date _____               |
| Name (12) _____                  | Signature _____                                                                                       | Date _____               |

Please scan and email to [stroke@strokeahajournal.org](mailto:stroke@strokeahajournal.org).
