# Supplementary material
Source: PubMed Central journal article supplement (PMC6538457)
Supplement: NIHMS1527011-supplement-Supplemental_Material.pdf [file NIHMS1527011-supplement-Supplemental_Material.pdf]

## SUPPLEMENTAL MATERIAL

## SUPPLEMENTAL METHODS

### Description of Datasets

#### GENISIS

The GENISIS study aims to understand the genetic architecture of early neurological change after ischemic stroke onset. It uses a quantitative clinical trait to measure the improvement or deterioration of each participant by calculating the difference between the NIHSS at baseline (within 6 hours after stroke onset) and at 24 hours ( $\Delta$ NIHSS). This endophenotype ( $\Delta$ NIHSS) accounts for a large proportion of the variance in the 3-month modified ranking scale (personal communication with Dr. Heitsch). Written informed consent was obtained from all participants or their proxy prior to enrollment. This study was reviewed and approved by the Institutional Review Board at Washington University in St. Louis and all participating centers.

To date, 2,317 participants have been included in the GENISIS study (Table 1). It is a multi-ethnic study as it recruits subjects from multiple genetic backgrounds from Europe and the United States (Supplementary Figure I–Panel A for clustering by PCA Principal Component Analysis (PCA) using HapMap as anchor).<sup>17</sup> European Ancestry was defined as those clustering in with the Non-Hispanic Whites (NHW) population from HapMap (Supplementary Figure I–Panel B). Although the study includes a subset of African American individuals (N=187), it is mainly composed of European populations (N=2,130), the latter of which includes a Finnish cohort (N=391). The Finnish population has been considered to be a homogeneous isolate with reduced diversity.<sup>18</sup> Moreover, it has the greatest fixation indices in Europe, and clusters separately from the other European populations (Supplementary Figure I–Panel B). We defined those cluster as: Finnish Cluster  $PC1 > 0.08$  and  $0.02 < PC2 < 0.08$ , and Non-Hispanic White cluster  $PC1 > 0$  and  $PC2 < 0.02$ . Finnish individuals were included or excluded depending on the analyses.

The cohort from Barcelona (Spain) included 1,198 individuals. This population has a median age of 78.0 (75.0–76.5) and with a median baseline NIHSS of 9.0 and delta NIHSS of 2.66 ( $\pm 5.67$ ). Of these, 46.77% were females and 64.83% were treated with tPA. The cohort from Helsinki (Finland) consisted of 391 individuals with median age of 67.0 (64.5–67.5). Of these, 38.94% were females and 48.85% were treated with tPA. This cohort presented a median baseline NIHSS of 5.0 and mean delta NIHSS of 2.33 ( $\pm 5.95$ ). The last European population was from Krakow (Poland). Of the 111 individuals, 47.75% were females and 51.35% were treated with tPA. The median age was 69.0 (68.0–73.0). The median baseline NIHSS was 6.0 and the mean delta NIHSS was 2.23 ( $\pm 4.42$ ). The cohort from Saint Louis (US) was classified by ethnicity (430 European Americans and 187 African Americans). The median age for the individuals of European Ancestry was 70.0 (68.0–70.5), whereas individuals of African Ancestry had a median age of 62.0 (61.0–65.5). The proportion of females was 43.91% in the European American group and 57.67% in the African American group. The proportion of tPA treatment was the same in both populations, a little over 79%. The median baseline NIHSS was also the same (7.0) whereas delta NIHSS was different by half a point (European American  $1.93 \pm 6.11$  and African American  $2.43 \pm 6.04$ ). In all populations, the most common stroke etiology was Cardioembolic stroke (Table 1). The factors contributing the most to Delta NIHSS and Baseline NIHSS, apart from TOAST, were age and glucose levels at baseline. Blood pressure levels were also associated with Baseline NIHSS.

All the individuals were genotyped using Illumina genotyping arrays and underwent standard quality control. Individuals with less than 98% of the SNPs genotyped were removed from the analyses. Likewise, SNPs with call rate less than 98% were excluded. After quality control, samples were imputed with SHAPTEIT and IMPUTE2 with the 1,000 Genomes Project Phase 3 as the reference panel. All genotypes with dosage levels  $< 0.9$  for all possible genotypes or with information scores  $< 0.3$  were excluded. Variants

out of Hardy Weinberg Equilibrium (HWE) ( $p < 1 \times 10^{-6}$ ) or with a genotyping rate below 98% were also removed. The different datasets were imputed separately and then combined to perform the analyses.

### **MEGASTROKE**

The MEGASTROKE study examined the genetic architecture of stroke risk, and that of stroke subtypes (All stroke, all ischemic stroke), and underlying stroke etiologies (large artery stroke, cardioembolic stroke and small vessel disease). Statistically, they conducted fixed effects inverse variance weighted meta-analysis with METAL (SR1) in each ethnic group (European, Asian, African, South Asian, Latin and other Asians). Then they performed an ancestry-specific meta-analysis. They also performed a trans-ethnic meta-analysis using MANTRA (SR2) to meta-analyze the results from all the ethnicities taking into account different effects and minor allele frequencies.

### **References for the Supplemental Methods**

SR1. Willer CJ, Li Y, Abecasis GR. Metal: Fast and efficient meta-analysis of genomewide association scans. *Bioinformatics*. 2010;26:2190-2191

SR2. Morris AP. Transethnic meta-analysis of genomewide association studies. *Genetic epidemiology*. 2011;35:809-822

## **SUPPLEMENTAL RESULTS**

### **Single variants**

The variant rs8103309 (associated with stroke risk in the Trans-Ethnic analyses), was found to be associated with  $\Delta$ NIHSS ( $p=0.031$ ) in the NFW population. The variant rs880315, associated with stroke risk and HTN (CHARGE) at genome-wide level, was nominally associated with baseline NIHSS ( $p=0.013$ ) in the NFW population. One more variant, rs13143308, which was associated with stroke risk, was found to be nominally associated with baseline NIHSS in both NFW ( $p=0.028$ ) and NFW ( $p=0.042$ ) populations.

Multiple variants that had genome-wide significance in the T2DM study (Diagram) were found nominally associated with  $\Delta$ NIHSS (NFW: rs11759026- $p=0.026$  and rs810517- $p=0.016$ ; NFW: rs11759026- $p=0.027$ ) and with baseline NIHSS (NFW: rs4846569- $p=0.024$ , rs2215383- $p=0.017$ ; NFW: rs4846569- $p=0.023$ , rs2215383- $p=0.014$  and rs810517-  $p=0.046$ ).

**SUPPLEMENTAL TABLES**

**Supplementary Table I. Sentinel Polygenic Risk Score Single Variant Information**

| Chr                                       | Position    | Variant    | Gene/Nearest Gene | Effected Allele | Modeling Study          |        |                         |       | GENISIS       |       |       | PRS Included |     |
|-------------------------------------------|-------------|------------|-------------------|-----------------|-------------------------|--------|-------------------------|-------|---------------|-------|-------|--------------|-----|
|                                           |             |            |                   |                 | TE                      |        | NHW                     |       | maf           |       |       | TE           | NHW |
|                                           |             |            |                   |                 | P Value                 | OR     | P Value                 | OR    | TE            | HNW   | NHWE  | TE           | NHW |
| <b>Ischemic Stroke Risk (MegaStroke)</b>  |             |            |                   |                 |                         |        |                         |       |               |       |       |              |     |
| 1                                         | 10,796,866  | rs880315   | CASZ1             | C               | 5.505×10 <sup>-09</sup> | 1.054  | ns                      | -     | 0.357         | 0.381 | 0.369 | ✓            | ✗   |
| 1                                         | 156,202,173 | rs1052053  | PMF1-BGLAP-SEMA4A | G               | 4.479×10 <sup>-11</sup> | 0.944  | 5.257×10 <sup>-09</sup> | 0.940 | 0.410         | 0.383 | 0.393 | ✓            | ✓   |
| 4                                         | 111,714,419 | rs13143308 | PITX2             | T               | 1.107×10 <sup>-15</sup> | 1.079  | 4.884×10 <sup>-14</sup> | 1.094 | 0.261         | 0.262 | 0.245 | ✓            | ✓   |
| 4                                         | 113,732,090 | rs34311906 | ANK2              | T               | ns                      | -      | 1.07×10 <sup>-08</sup>  | 0.937 | Not Available |       |       | ✗            | ✗   |
| 4                                         | 155,501,188 | rs6825454  | FGA-FGB-FGG       | C               | 7.431×10 <sup>-10</sup> | 1.058  | ns                      | ns    | 0.239         | 0.245 | 0.230 | ✓            | ✗   |
| 5                                         | 121,515,195 | rs11957829 | LOC100505841      | G               | 7.514×10 <sup>-09</sup> | 0.931  | ns                      | -     | 0.191         | 0.192 | 0.190 | ✓            | ✗   |
| 6                                         | 1,356,916   | rs4959130  | FOXF2-FOXQ1       | A               | 2.829×10 <sup>-09</sup> | 1.087  | 1.865×10 <sup>-09</sup> | 1.090 | 0.120         | 0.128 | 0.128 | ✓            | ✓   |
| 7                                         | 19,049,388  | rs2107595  | HDAC9             | G               | 9.253×10 <sup>-14</sup> | 1.079  | 2.33×10 <sup>-11</sup>  | 0.916 | Not Available |       |       | ✗            | ✗   |
| 7                                         | 92,244,422  | rs42039    | CDK6              | C               | 6.554×10 <sup>-09</sup> | 1.068  | ns                      | -     | 0.751         | 0.736 | 0.732 | ✓            | ✗   |
| 9                                         | 22,102,165  | rs7859727  | CDKN2B-AS1        | T               | 1.047×10 <sup>-09</sup> | 1.053  | ns                      | -     | 0.568         | 0.538 | 0.567 | ✓            | ✗   |
| 9                                         | 136,155,000 | rs635634   | ABO-SURF1         | T               | ns                      | -      | 9.179×10 <sup>-09</sup> | 1.080 | 0.219         | 0.231 | 0.229 | ✗            | ✓   |
| 11                                        | 102,770,353 | rs2005108  | MMP12-MMP1-MMP3   | T               | 3.327×10 <sup>-08</sup> | 1.083  | ns                      | -     | 0.131         | 0.139 | 0.131 | ✓            | ✗   |
| 12                                        | 111,884,608 | rs3184504  | Chr12q24          | T               | 2.172×10 <sup>-14</sup> | 1.078  | 1.229×10 <sup>-14</sup> | 1.081 | 0.453         | 0.479 | 0.491 | ✓            | ✓   |
| 12                                        | 115,554,523 | rs35436    | TBX3              | T               | 3.214×10 <sup>-08</sup> | 0.952  | ns                      | -     | 0.371         | 0.360 | 0.364 | ✓            | ✗   |
| 13                                        | 47,225,745  | rs9526212  | LRCH1             | C               | 9.185×10 <sup>-10</sup> | 1.0363 | 3.557×10 <sup>-08</sup> | 1.066 | 0.778         | 0.790 | 0.787 | ✓            | ✓   |
| 15                                        | 91,404,705  | rs4932370  | FURIN-FES         | G               | 2.881×10 <sup>-08</sup> | 1.053  | ns                      | -     | Not Available |       |       | ✗            | ✗   |
| 16                                        | 87,575,332  | rs12445022 | Chr16q24          | A               | 1.284×10 <sup>-10</sup> | 1.063  | ns                      | -     | Not Available |       |       | ✗            | ✗   |
| 17                                        | 1,571,818   | rs11867415 | PRPF8-SCARF1      | A               | 4.813×10 <sup>-08</sup> | 0.916  | ns                      | -     | Not Available |       |       | ✗            | ✗   |
| 19                                        | 10,794,630  | rs2229383  | ILF3-SLC44A2      | T               | 4.721×10 <sup>-08</sup> | 1.049  | ns                      | -     | 0.634         | 0.627 | 0.618 | ✓            | ✗   |
| 19                                        | 11,174,935  | rs8103309  | SMARCA4-LDLR      | T               | 8.346×10 <sup>-08</sup> | 1.053  | ns                      | -     | 0.625         | 0.645 | 0.623 | ✓            | ✗   |
| <b>Type 2 Diabetes Mellitus (Diagram)</b> |             |            |                   |                 |                         |        |                         |       |               |       |       |              |     |
| 1                                         | 219,771,721 | rs4846569  | NOTCH2            | T               | -                       | -      | 8.80×10 <sup>-09</sup>  | 2.524 | 0.264         | 0.285 | 0.278 | ✗            | ✓   |
| 2                                         | 43,734,847  | rs6757251  | -                 | T               | -                       | -      | 1.90×10 <sup>-10</sup>  | 2.406 | 0.107         | 0.091 | 0.101 | ✗            | ✓   |
| 2                                         | 60,552,476  | rs10193447 | THADA             | T               | -                       | -      | 1.30×10 <sup>-08</sup>  | 2.926 | 0.605         | 0.600 | 0.593 | ✗            | ✗   |

|    |             |             |                                |   |   |   |                         |       |       |       |       |   |   |
|----|-------------|-------------|--------------------------------|---|---|---|-------------------------|-------|-------|-------|-------|---|---|
| 2  | 227,117,778 | rs2972156   | <i>BCL11A</i>                  | C | - | - | $1.20 \times 10^{-09}$  | 2.526 | 0.348 | 0.364 | 0.369 | ✗ | ✓ |
| 3  | 12,344,730  | rs11712037  | <i>IRS1</i>                    | C | - | - | $8.60 \times 10^{-13}$  | 3.123 | 0.108 | 0.119 | 0.108 | ✗ | ✓ |
| 3  | 23,455,582  | rs35352848  | <i>PPAR<math>\gamma</math></i> | T | - | - | $1.50 \times 10^{-08}$  | 2.964 | 0.769 | 0.774 | 0.795 | ✗ | ✓ |
| 3  | 64,710,850  | rs7428936   | -                              | T | - | - | $1.00 \times 10^{-08}$  | 2.923 | 0.538 | 0.564 | 0.546 | ✗ | ✗ |
| 3  | 123,065,778 | rs11708067  | <i>ADAMTS9</i>                 | A | - | - | $8.80 \times 10^{-13}$  | 3.053 | 0.828 | 0.827 | 0.827 | ✗ | ✓ |
| 3  | 185,511,687 | rs4402960   | <i>IGF2BP2</i>                 | T | - | - | $2.70 \times 10^{-25}$  | 3.159 | 0.317 | 0.299 | 0.296 | ✗ | ✓ |
| 4  | 6,299,940   | rs3821943   | <i>WFS1</i>                    | T | - | - | $4.20 \times 10^{-16}$  | 3.020 | 0.534 | 0.536 | 0.539 | ✗ | ✓ |
| 4  | 185,708,807 | rs60780116  | <i>ACSL1</i>                   | T | - | - | $7.40 \times 10^{-08}$  | 2.987 | 0.846 | 0.825 | 0.825 | ✗ | ✗ |
| 5  | 55,861,464  | rs28650790* | <i>ZBED3</i>                   | T | - | - | $7.40 \times 10^{-10}$  | 3.020 | 0.191 | 0.193 | 0.200 | ✗ | ✓ |
| 6  | 20,673,880  | rs7451008   | <i>CDKAL1</i>                  | T | - | - | $3.80 \times 10^{-37}$  | 2.325 | 0.734 | 0.726 | 0.737 | ✗ | ✓ |
| 6  | 126,792,095 | rs11759026  | -                              | A | - | - | $5.80 \times 10^{-10}$  | 2.492 | 0.763 | 0.754 | 0.750 | ✗ | ✓ |
| 7  | 15,062,983  | rs2215383   | <i>JAZF1</i>                   | T | - | - | $1.40 \times 10^{-08}$  | 2.543 | 0.441 | 0.452 | 0.432 | ✗ | ✓ |
| 7  | 28,189,411  | rs1635852   | <i>KLF14</i>                   | T | - | - | $3.00 \times 10^{-14}$  | 2.993 | 0.510 | 0.495 | 0.489 | ✗ | ✓ |
| 8  | 118,185,025 | rs3802177   | <i>TP53INF1</i>                | A | - | - | $1.70 \times 10^{-17}$  | 2.449 | 0.288 | 0.312 | 0.299 | ✗ | ✓ |
| 9  | 22,133,284  | rs10965250  | <i>SLC30A8</i>                 | A | - | - | $2.70 \times 10^{-17}$  | 2.385 | 0.179 | 0.184 | 0.191 | ✗ | ✓ |
| 9  | 84,311,800  | rs9410573   | <i>CDKN2A/2B</i>               | T | - | - | $2.00 \times 10^{-08}$  | 2.932 | 0.707 | 0.591 | 0.608 | ✗ | ✗ |
| 9  | 126,112,812 | rs10760280  | <i>CHCHD9</i>                  | T | - | - | $7.30 \times 10^{-08}$  | 2.916 | 0.649 | 0.525 | 0.525 | ✗ | ✗ |
| 10 | 12,309,269  | rs11257659  | <i>CDC123/<br/>CAMK1D</i>      | T | - | - | $2.70 \times 10^{-08}$  | 2.958 | 0.240 | 0.228 | 0.221 | ✗ | ✗ |
| 10 | 80,942,620  | rs810517    | -                              | T | - | - | $1.30 \times 10^{-12}$  | 2.496 | 0.470 | 0.472 | 0.469 | ✗ | ✓ |
| 10 | 94,444,793  | rs10882098  | <i>HHEXADE</i>                 | T | - | - | $1.40 \times 10^{-26}$  | 2.406 | 0.366 | 0.392 | 0.372 | ✗ | ✓ |
| 10 | 114,758,349 | rs7903146   | <i>TCF7LS</i>                  | T | - | - | $9.30 \times 10^{-108}$ | 3.805 | 0.318 | 0.302 | 0.327 | ✗ | ✓ |
| 11 | 2,857,194   | rs2237895   | <i>KCNQ1</i>                   | A | - | - | $1.70 \times 10^{-13}$  | 2.478 | 0.608 | 0.592 | 0.601 | ✗ | ✗ |
| 11 | 17,409,572  | rs5219      | -                              | T | - | - | $4.30 \times 10^{-08}$  | 2.916 | 0.372 | 0.400 | 0.387 | ✗ | ✓ |
| 11 | 43,877,934  | rs1061810   | <i>KCNJ11</i>                  | A | - | - | $5.30 \times 10^{-09}$  | 2.954 | 0.304 | 0.301 | 0.291 | ✗ | ✓ |
| 11 | 72,428,172  | rs76550717  | <i>CENTD2</i>                  | A | - | - | $3.80 \times 10^{-09}$  | 3.006 | 0.861 | 0.848 | 0.867 | ✗ | ✓ |
| 12 | 4,376,089   | rs4238013   | -                              | T | - | - | $3.60 \times 10^{-09}$  | 2.474 | 0.797 | 0.796 | 0.803 | ✗ | ✗ |
| 12 | 121,432,117 | rs56348580  | <i>MTNR1B</i>                  | C | - | - | $2.50 \times 10^{-08}$  | 2.533 | 0.305 | 0.303 | 0.314 | ✗ | ✓ |
| 13 | 80,705,315  | rs11616380  | -                              | T | - | - | $3.90 \times 10^{-11}$  | 2.494 | 0.260 | 0.273 | 0.271 | ✗ | ✓ |
| 15 | 62,117,975  | rs4774420   | <i>HMGA2</i>                   | T | - | - | $2.70 \times 10^{-08}$  | 2.529 | 0.302 | 0.288 | 0.291 | ✗ | ✗ |
| 15 | 77,776,498  | rs952471    | <i>TSPAN8/LGR5</i>             | C | - | - | $4.00 \times 10^{-10}$  | 2.512 | 0.314 | 0.307 | 0.305 | ✗ | ✓ |
| 16 | 53,803,574  | rs1558902   | <i>HNF1A</i>                   | A | - | - | $4.70 \times 10^{-25}$  | 3.123 | 0.422 | 0.434 | 0.418 | ✗ | ✓ |
| 16 | 75,252,327  | rs8056814   | -                              | A | - | - | $3.70 \times 10^{-11}$  | 2.365 | 0.113 | 0.095 | 0.098 | ✗ | ✓ |

|                              |             |              |        |   |   |   |                        |       |       |       |       |   |   |
|------------------------------|-------------|--------------|--------|---|---|---|------------------------|-------|-------|-------|-------|---|---|
| 16                           | 81,534,790  | rs2925979    | ZFAND6 | T | - | - | 2.70×10 <sup>-08</sup> | 2.935 | 0.270 | 0.270 | 0.263 | ✘ | ✓ |
| 17                           | 9,780,387   | rs78761021** | PRC1   | A | - | - | 5.50×10 <sup>-08</sup> | 2.541 | 0.714 | 0.688 | 0.688 | ✘ | ✓ |
| 17                           | 36,102,833  | rs757209     | FTD    | A | - | - | 1.10×10 <sup>-09</sup> | 2.510 | 0.319 | 0.345 | 0.345 | ✘ | ✘ |
| 19                           | 45,411,941  | rs429358     |        | T | - | - | 1.40×10 <sup>-10</sup> | 3.088 | 0.904 | 0.896 | 0.919 | ✘ | ✘ |
| 22                           | 30,599,562  | rs2023681    | HNF1B  | A | - | - | 3.90×10 <sup>-09</sup> | 2.428 | 0.081 | 0.081 | 0.079 | ✘ | ✘ |
| <b>Hypertension (CHARGE)</b> |             |              |        |   |   |   |                        |       |       |       |       |   |   |
| 1                            | 10,796,866  | rs880315     | CASZ9  | C | - | - | 6.74×10 <sup>-10</sup> | 1.032 | 0.357 | 0.381 | 0.369 | ✘ | ✓ |
| 6                            | 26,107,463  | rs198846     |        | A | - | - | 5.65×10 <sup>-09</sup> | 1.040 | 0.175 | 0.174 | 0.188 | ✘ | ✓ |
| 10                           | 104,652,323 | rs11191447   |        | T | - | - | 1.42×10 <sup>-08</sup> | 1.052 | 0.102 | 0.101 | 0.106 | ✘ | ✓ |
| 12                           | 112,007,756 | rs653178     |        | C | - | - | 2.76×10 <sup>-08</sup> | 1.027 | 0.455 | 0.482 | 0.491 | ✘ | ✓ |
| 12                           | 90,008,959  | rs2681472    |        | G | - | - | 8.93×10 <sup>-09</sup> | 1.038 | 0.153 | 0.150 | 0.168 | ✘ | ✓ |

Chr = Chromosome; OR = Odds Ratio; maf = minor allele frequency; PRS = Polygenic Risk Score; TE = Trans-Ethnic; NHW = Non-Hispanic White; NHFW = Non-Hispanic Non-Finnish White; LD = Linkage Disequilibrium; \*Proxy: rs13173241 (LD = 0.91); \*\*Proxy: rs62066051 (LD = 0.92)

**Supplementary Table II.** Analysis of Variance Results

| <b>Source</b>  | <b>Delta NIHSS</b> |                 |
|----------------|--------------------|-----------------|
|                | <b>NHW</b>         | <b>NHFW</b>     |
|                | <b>Variance</b>    | <b>Variance</b> |
| <b>V(G)</b>    | 2.20               | 2.83            |
| <b>V(e)</b>    | 27.06              | 27.14           |
| <b>Vp</b>      | 29.26              | 29.97           |
| <b>V(G)/Vp</b> | 7.52%              | 9.45%           |
| <b>N</b>       | 2130               | 1739            |

SE = Standard Error; V(G) = Genetic Variance; V(e) = Residual Variance; Vp = Proportion of variance explained by all SNPs; V(G)/Vp = Proportion of Phenotypic Variance explained by the Genetic Variance; Pval = P value; N = Sample Size



Supplementary Table III. P values for Sentinel SNPs in the GENISIS Cohorts

| Chr                                           | Position    | Variant    | GENISIS Cohort P Values |       |              |          |              |              |
|-----------------------------------------------|-------------|------------|-------------------------|-------|--------------|----------|--------------|--------------|
|                                               |             |            | Delta                   |       |              | Baseline |              |              |
|                                               |             |            | TE*                     | NHW   | NHFW         | TE*      | NHW          | NHFW         |
| <b>Stroke Risk Sentinel SNPs (MegaStroke)</b> |             |            |                         |       |              |          |              |              |
| 1                                             | 10,796,866  | rs880315   | -0.471                  | 0.893 | 0.427        | 0.912    | <b>0.013</b> | 0.057        |
| 1                                             | 156,202,173 | rs1052053  | -0.006                  | 0.508 | 0.715        | -0.520   | 0.653        | 0.684        |
| 4                                             | 111,714,419 | rs13143308 | -0.410                  | 0.884 | 0.520        | 0.823    | <b>0.028</b> | <b>0.042</b> |
| 4                                             | 155,501,188 | rs6825454  | -0.335                  | 0.426 | 0.219        | -0.248   | 0.203        | 0.122        |
| 5                                             | 121,515,195 | rs11957829 | -0.381                  | 0.860 | 0.986        | -0.641   | 0.771        | 0.645        |
| 6                                             | 1,356,916   | rs4959130  | -                       | 0.169 | 0.205        | -        | 0.569        | 0.758        |
| 7                                             | 92,244,422  | rs42039    | -0.549                  | 0.371 | 0.384        | -0.320   | 0.855        | 0.567        |
| 9                                             | 22,102,165  | rs7859727  | -0.547                  | 0.177 | 0.189        | -0.129   | 0.231        | 0.166        |
| 9                                             | 136,155,000 | rs635634   | -1.260                  | 0.771 | 0.574        | -0.615   | 0.243        | 0.319        |
| 11                                            | 102,770,353 | rs2005108  | -0.275                  | 0.676 | 0.735        | -0.554   | 0.776        | 0.450        |
| 12                                            | 111,884,608 | rs3184504  | -0.401                  | 0.585 | 0.281        | -0.393   | 0.382        | 0.386        |
| 12                                            | 115,554,523 | rs35436    | -0.405                  | 0.953 | 0.691        | 0.041    | 0.104        | 0.170        |
| 13                                            | 47,225,745  | rs9526212  | -0.828                  | 0.792 | 0.370        | -1.026   | 0.984        | 0.669        |
| 19                                            | 10,794,630  | rs2229383  | -0.516                  | 0.687 | 0.867        | -0.239   | 0.366        | 0.396        |
| 19                                            | 11,174,935  | rs8103309  | -0.288                  | 0.080 | <b>0.031</b> | -0.364   | 0.775        | 0.516        |
| <b>Type 2 Diabetes Mellitus (Diagram)</b>     |             |            |                         |       |              |          |              |              |
| 1                                             | 219,771,721 | rs4846569  | -                       | 0.785 | 0.579        | -        | <b>0.024</b> | <b>0.023</b> |
| 2                                             | 43,734,847  | rs6757251  | -                       | 0.246 | 0.557        | -        | 0.696        | 0.452        |
| 2                                             | 60,552,476  | rs10193447 | -                       | 0.557 | 0.393        | -        | 0.897        | 0.787        |
| 2                                             | 227,117,778 | rs2972156  | -                       | 0.093 | 0.204        | -        | 0.762        | 0.963        |
| 3                                             | 12,344,730  | rs11712037 | -                       | 0.223 | 0.650        | -        | 0.943        | 0.568        |
| 3                                             | 23,455,582  | rs35352848 | -                       | 0.097 | 0.137        | -        | 0.110        | 0.083        |
| 3                                             | 64,710,850  | rs7428936  | -                       | 0.408 | 0.457        | -        | 0.907        | 0.885        |
| 3                                             | 123,065,778 | rs11708067 | -                       | 0.688 | 0.861        | -        | 0.180        | 0.145        |
| 3                                             | 185,511,687 | rs4402960  | -                       | 0.815 | 0.867        | -        | 0.179        | 0.072        |
| 4                                             | 6,299,940   | rs3821943  | -                       | 0.902 | 0.342        | -        | 0.152        | 0.112        |
| 4                                             | 185,708,807 | rs60780116 | -                       | 0.917 | 0.917        | -        | 0.983        | 0.983        |
| 5                                             | 55,861,464  | rs28650790 | -                       | 0.226 | 0.354        | -        | 0.766        | 0.870        |
| 6                                             | 20,673,880  | rs7451008  | -                       | 0.084 | 0.174        | -        | 0.990        | 0.813        |

|    |             |            |   |              |              |   |              |              |
|----|-------------|------------|---|--------------|--------------|---|--------------|--------------|
| 6  | 126,792,095 | rs11759026 | - | <b>0.026</b> | <b>0.027</b> | - | 0.065        | 0.145        |
| 7  | 15,062,983  | rs2215383  | - | 0.170        | 0.614        | - | <b>0.017</b> | <b>0.014</b> |
| 7  | 28,189,411  | rs1635852  | - | 0.727        | 0.760        | - | 0.997        | 0.665        |
| 8  | 118,185,025 | rs3802177  | - | 0.405        | 0.987        | - | 0.487        | 0.912        |
| 9  | 22,133,284  | rs10965250 | - | 0.626        | 0.843        | - | 0.543        | 0.180        |
| 9  | 84,311,800  | rs9410573  | - | 0.824        | 0.952        | - | 0.894        | 0.664        |
| 9  | 126,112,812 | rs10760280 | - | 0.520        | 0.520        | - | 0.168        | 0.168        |
| 10 | 12,309,269  | rs11257659 | - | 0.122        | 0.260        | - | 0.492        | 0.603        |
| 10 | 80,942,620  | rs810517   | - | <b>0.016</b> | 0.300        | - | 0.214        | <b>0.046</b> |
| 10 | 94,444,793  | rs10882098 | - | 0.987        | 0.524        | - | 0.962        | 0.239        |
| 10 | 114,758,349 | rs7903146  | - | 0.602        | 0.982        | - | 0.732        | 0.381        |
| 11 | 2,857,194   | rs2237895  | - | 0.537        | 0.574        | - | 0.396        | 0.599        |
| 11 | 17,409,572  | rs5219     | - | 0.733        | 0.415        | - | 0.514        | 0.674        |
| 11 | 43,877,934  | rs1061810  | - | 0.466        | 0.537        | - | 0.977        | 0.829        |
| 11 | 72,428,172  | rs76550717 | - | 0.691        | 0.154        | - | 0.352        | 0.348        |
| 12 | 4,376,089   | rs4238013  | - | 0.409        | 0.916        | - | 0.299        | 0.816        |
| 12 | 121,432,117 | rs56348580 | - | 0.217        | 0.330        | - | 0.986        | 0.841        |
| 13 | 80,705,315  | rs11616380 | - | 0.325        | 0.152        | - | 0.191        | 0.237        |
| 15 | 62,117,975  | rs4774420  | - | 0.716        | 0.624        | - | 0.181        | 0.523        |
| 15 | 77,776,498  | rs952471   | - | 0.097        | 0.332        | - | 0.095        | 0.085        |
| 16 | 53,803,574  | rs1558902  | - | 0.649        | 0.776        | - | 0.240        | 0.570        |
| 16 | 75,252,327  | rs8056814  | - | 0.790        | 0.827        | - | 0.923        | 0.738        |
| 16 | 81,534,790  | rs2925979  | - | 0.474        | 0.278        | - | 0.599        | 0.524        |
| 17 | 9,780,387   | rs78761021 | - | 0.091        | 0.091        | - | 0.259        | 0.259        |
| 17 | 36,102,833  | rs757209   | - | 0.287        | 0.287        | - | 0.273        | 0.273        |
| 19 | 45,411,941  | rs429358   | - | 0.204        | 0.393        | - | 0.576        | 0.200        |
| 22 | 30,599,562  | rs2023681  | - | 0.776        | 0.849        | - | 0.125        | 0.101        |

---

**Hypertension Sentinel SNPs (CHARGE)**

---

|    |             |            |   |       |       |   |              |       |
|----|-------------|------------|---|-------|-------|---|--------------|-------|
| 1  | 10,796,866  | rs880315   | - | 0.893 | 0.427 | - | <b>0.013</b> | 0.057 |
| 6  | 26,107,463  | rs198846   | - | 0.085 | 0.176 | - | 0.978        | 0.857 |
| 10 | 104,652,323 | rs11191447 | - | 0.828 | 0.945 | - | 0.450        | 0.770 |
| 12 | 112,007,756 | rs653178   | - | 0.475 | 0.249 | - | 0.366        | 0.365 |
| 12 | 90,008,959  | rs2681472  | - | 0.909 | 0.874 | - | 0.536        | 0.353 |

Chr = Chromosome; PRS = Polygenic Risk Score; TE = Trans-Ethnic; NHW = Non-Hispanic Whites; NHFW = Non-Hispanic Non-Finnish Whites; Nominally significant p values are in bold; Variants not included in the sentinel PRS are in italics; \*Bayesian Factor; \*\*Proxy included in the sentinel PRS instead of the variant (See table 2 for proxy rs number)

Supplementary Table IV. P-values for the association of the in-house PRS for ischemic stroke with  $\Delta$ NIHSS and baseline NIHSS

|                | Stroke Risk Sentinel SNPs (MegaStroke)           |                    |                                |
|----------------|--------------------------------------------------|--------------------|--------------------------------|
|                | Trans-ethnic                                     | Non-Hispanic White | Non-Hispanic Non-Finnish White |
| $\Delta$ NIHSS | <b>0.174</b>                                     | <b>0.411</b>       | <b>0.062</b>                   |
| Baseline NIHSS | <b>0.496</b>                                     | <b>0.060</b>       | <b>0.085</b>                   |
|                | Type 2 Diabetes Mellitus Sentinel SNPs (Diagram) |                    |                                |
| $\Delta$ NIHSS | -                                                | <b>0.817</b>       | <b>0.803</b>                   |
| Baseline NIHSS | -                                                | <b>0.735</b>       | <b>0.192</b>                   |
|                | Hypertension Sentinel SNPs (CHARGE)              |                    |                                |
| $\Delta$ NIHSS | -                                                | <b>0.313</b>       | <b>0.125</b>                   |
| Baseline NIHSS | -                                                | <b>0.349</b>       | <b>0.842</b>                   |

Nominally significant p values are in bold ; Diagram and CHARGE meta-analyses only included individuals with European Ancestry, in consequence the genetic architecture was not compared to the genetic architecture of trans-ethnic stroke risk

**Supplementary Table V.** PRSice results for each phenotype, population and p value threshold

| Base File                 | Target File |                | PRSice Results    |          |          |        |
|---------------------------|-------------|----------------|-------------------|----------|----------|--------|
|                           | Population  | Phenotype      | P value Threshold | P value  | Variance | SNPs   |
| Stroke Risk<br>MegaStroke | TE          | Delta<br>NIHSS | 5.00E-08          | 9.39E-01 | 2.23E-06 | 19     |
|                           |             |                | 5.00E-06          | 6.06E-01 | 1.01E-04 | 49     |
|                           |             |                | 1.00E-05          | 3.90E-01 | 2.80E-04 | 71     |
|                           |             |                | 1.00E-03          | 3.86E-01 | 2.84E-04 | 1257   |
|                           |             |                | 1.00E-02          | 1.54E-01 | 7.71E-04 | 7907   |
|                           |             |                | 5.00E-02          | 1.71E-01 | 7.08E-04 | 27378  |
|                           |             |                | 2.00E-01          | 4.41E-01 | 2.25E-04 | 77153  |
|                           |             |                | 5.00E-01          | 3.09E-01 | 3.91E-04 | 141954 |
|                           |             |                | 1.00E+00          | 2.49E-01 | 5.04E-04 | 203061 |
|                           |             |                | 5.00E-08          | 7.13E-01 | 5.48E-05 | 19     |
|                           |             |                | 5.00E-06          | 5.98E-01 | 1.12E-04 | 49     |
|                           |             |                | 1.00E-05          | 3.91E-01 | 2.97E-04 | 71     |
|                           | 1.00E-03    | 8.98E-01       | 6.65E-06          | 1257     |          |        |
|                           | 1.00E-02    | 4.95E-01       | 1.88E-04          | 7907     |          |        |
|                           | 5.00E-02    | 2.38E-01       | 5.62E-04          | 27378    |          |        |
|                           | 2.00E-01    | 5.70E-01       | 1.30E-04          | 77153    |          |        |
|                           | 5.00E-01    | 5.05E-01       | 1.80E-04          | 141954   |          |        |
|                           | 1.00E+00    | 5.04E-01       | 1.81E-04          | 203061   |          |        |
|                           | NHW         | Delta<br>NIHSS | 5.00E-08          | 7.81E-01 | 3.21E-05 | 13     |
|                           |             |                | 5.00E-06          | 4.04E-01 | 2.89E-04 | 39     |
|                           |             |                | 1.00E-05          | 2.84E-01 | 4.76E-04 | 55     |
|                           |             |                | 1.00E-03          | 5.51E-02 | 1.53E-03 | 1003   |
|                           |             |                | 1.00E-02          | 4.27E-01 | 2.62E-04 | 6627   |
|                           |             |                | 5.00E-02          | 5.95E-01 | 1.17E-04 | 24202  |
| 2.00E-01                  |             |                | 9.30E-01          | 3.16E-06 | 71116    |        |
| 5.00E-01                  |             |                | 9.22E-01          | 4.02E-06 | 136023   |        |

| Base File | Target File       |           | PRSiCe Results    |                 |          |        |
|-----------|-------------------|-----------|-------------------|-----------------|----------|--------|
|           | Population        | Phenotype | P value Threshold | P value         | Variance | SNPs   |
|           | Baseline<br>NIHSS |           | 1.00E+00          | 7.87E-01        | 3.03E-05 | 200385 |
|           |                   |           | 5.00E-08          | 8.36E-01        | 1.89E-05 | 13     |
|           |                   |           | 5.00E-06          | 2.50E-01        | 5.78E-04 | 39     |
|           |                   |           | 1.00E-05          | 1.83E-01        | 7.74E-04 | 55     |
|           |                   |           | 1.00E-03          | 9.32E-01        | 3.16E-06 | 1003   |
|           |                   |           | 1.00E-02          | 5.66E-02        | 1.59E-03 | 6627   |
|           |                   |           | 5.00E-02          | <b>3.60E-02</b> | 1.92E-03 | 24202  |
|           |                   |           | 2.00E-01          | <b>1.89E-02</b> | 2.41E-03 | 71116  |
|           |                   |           | 5.00E-01          | <b>5.89E-03</b> | 3.31E-03 | 136023 |
|           |                   |           | 1.00E+00          | <b>7.72E-03</b> | 3.10E-03 | 200385 |
|           | Delta<br>NIHSS    |           | 5.00E-08          | 2.07E-01        | 8.42E-04 | 13     |
|           |                   |           | 5.00E-06          | 9.02E-02        | 1.52E-03 | 39     |
|           |                   |           | 1.00E-05          | 9.31E-02        | 1.49E-03 | 55     |
|           |                   |           | 1.00E-03          | <b>1.38E-02</b> | 3.20E-03 | 1003   |
|           |                   |           | 1.00E-02          | 3.75E-01        | 4.16E-04 | 6627   |
|           |                   |           | 5.00E-02          | 5.89E-01        | 1.54E-04 | 24202  |
|           |                   |           | 2.00E-01          | 9.81E-01        | 3.02E-07 | 71116  |
|           |                   |           | 5.00E-01          | 9.80E-01        | 3.34E-07 | 136023 |
|           |                   |           | 1.00E+00          | 8.30E-01        | 2.43E-05 | 200385 |
| NHFW      | Baseline<br>NIHSS |           | 5.00E-08          | 9.94E-01        | 3.36E-08 | 13     |
|           |                   |           | 5.00E-06          | 4.61E-01        | 2.96E-04 | 39     |
|           |                   |           | 1.00E-05          | 3.51E-01        | 4.73E-04 | 55     |
|           |                   |           | 1.00E-03          | 8.62E-01        | 1.65E-05 | 1003   |
|           |                   |           | 1.00E-02          | 5.78E-02        | 1.96E-03 | 6627   |
|           |                   |           | 5.00E-02          | 1.45E-01        | 1.16E-03 | 24202  |
|           |                   |           | 2.00E-01          | 9.20E-02        | 1.54E-03 | 71116  |
|           |                   |           | 5.00E-01          | <b>2.95E-02</b> | 2.57E-03 | 136023 |
|           |                   |           | 1.00E+00          | <b>3.12E-02</b> | 2.52E-03 | 200385 |

| Base File       | Target File |                 | PRSiCe Results    |                 |          |        |
|-----------------|-------------|-----------------|-------------------|-----------------|----------|--------|
|                 | Population  | Phenotype       | P value Threshold | P value         | Variance | SNPs   |
| T2DM<br>Diagram | NHW         | Delta<br>NIHSS  | 5.00E-08          | 4.83E-01        | 2.04E-04 | 80     |
|                 |             |                 | 5.00E-06          | 3.64E-01        | 3.43E-04 | 217    |
|                 |             |                 | 1.00E-05          | 6.44E-01        | 8.84E-05 | 268    |
|                 |             |                 | 1.00E-03          | <b>7.19E-03</b> | 2.99E-03 | 4618   |
|                 |             |                 | 1.00E-02          | 6.81E-01        | 7.00E-05 | 30908  |
|                 |             |                 | 5.00E-02          | 4.41E-01        | 2.46E-04 | 123087 |
|                 |             |                 | 2.00E-01          | 2.37E-01        | 5.80E-04 | 387302 |
|                 |             |                 | 5.00E-01          | 1.80E-01        | 7.46E-04 | 773778 |
|                 |             |                 | 1.00E+00          | 2.33E-01        | 5.91E-04 | 1E+06  |
|                 |             |                 | 5.00E-08          | 9.40E-01        | 2.49E-06 | 80     |
|                 |             |                 | 5.00E-06          | 4.57E-01        | 2.42E-04 | 217    |
|                 |             |                 | 1.00E-05          | 4.47E-01        | 2.53E-04 | 268    |
|                 |             |                 | 1.00E-03          | 7.00E-01        | 6.48E-05 | 4618   |
|                 |             |                 | 1.00E-02          | 7.15E-01        | 5.85E-05 | 30908  |
|                 | 5.00E-02    | 5.15E-01        | 1.85E-04          | 123087          |          |        |
|                 | 2.00E-01    | 9.50E-01        | 1.71E-06          | 387302          |          |        |
|                 | 5.00E-01    | 8.22E-01        | 2.22E-05          | 773778          |          |        |
|                 | 1.00E+00    | 7.19E-01        | 5.67E-05          | 1E+06           |          |        |
|                 | 5.00E-08    | 3.13E-01        | 5.37E-04          | 80              |          |        |
|                 | 5.00E-06    | 6.29E-02        | 1.83E-03          | 217             |          |        |
|                 | 1.00E-05    | 1.71E-01        | 9.90E-04          | 268             |          |        |
|                 | 1.00E-03    | <b>2.43E-02</b> | 2.68E-03          | 4618            |          |        |
|                 | 1.00E-02    | 9.41E-01        | 2.91E-06          | 30908           |          |        |
|                 | 5.00E-02    | 9.28E-01        | 4.32E-06          | 123087          |          |        |
|                 | 2.00E-01    | 6.83E-01        | 8.81E-05          | 387302          |          |        |
|                 | 5.00E-01    | 6.10E-01        | 1.38E-04          | 773778          |          |        |
|                 | 1.00E+00    | 6.55E-01        | 1.06E-04          | 1E+06           |          |        |
|                 | 5.00E-08    | 9.63E-01        | 1.20E-06          | 80              |          |        |

| Base File     | Target File       |                   | PRSiCe Results    |          |          |        |
|---------------|-------------------|-------------------|-------------------|----------|----------|--------|
|               | Population        | Phenotype         | P value Threshold | P value  | Variance | SNPs   |
| HTN<br>CHARGE | NHW               | Baseline<br>NIHSS | 5.00E-06          | 6.34E-01 | 1.23E-04 | 217    |
|               |                   |                   | 1.00E-05          | 5.30E-01 | 2.14E-04 | 268    |
|               |                   |                   | 1.00E-03          | 6.04E-01 | 1.46E-04 | 4618   |
|               |                   |                   | 1.00E-02          | 7.17E-01 | 7.15E-05 | 30908  |
|               |                   |                   | 5.00E-02          | 7.24E-01 | 6.80E-05 | 123087 |
|               |                   |                   | 2.00E-01          | 8.85E-01 | 1.14E-05 | 387302 |
|               |                   |                   | 5.00E-01          | 6.11E-01 | 1.41E-04 | 773778 |
|               |                   |                   | 1.00E+00          | 6.11E-01 | 1.41E-04 | 1E+06  |
|               |                   | 5.00E-08          | 9.36E-02          | 1.17E-03 | 6        |        |
|               |                   | 5.00E-06          | 7.44E-01          | 4.42E-05 | 17       |        |
|               |                   | 1.00E-05          | 8.97E-01          | 6.89E-06 | 20       |        |
|               |                   | 1.00E-03          | 1.40E-01          | 9.01E-04 | 205      |        |
|               |                   | 1.00E-02          | 6.57E-02          | 1.40E-03 | 1257     |        |
|               |                   | 5.00E-02          | 6.57E-02          | 1.40E-03 | 1257     |        |
| 2.00E-01      | 6.57E-02          | 1.40E-03          | 1257              |          |          |        |
| 5.00E-01      | 6.57E-02          | 1.40E-03          | 1257              |          |          |        |
| 1.00E+00      | 6.57E-02          | 1.40E-03          | 1257              |          |          |        |
| 5.00E-08      |                   | <b>2.65E-02</b>   | 2.15E-03          | 6        |          |        |
| 5.00E-06      |                   | 6.61E-02          | 1.48E-03          | 17       |          |        |
| 1.00E-05      |                   | 3.09E-01          | 4.52E-04          | 20       |          |        |
| 1.00E-03      | Baseline<br>NIHSS | 1.27E-01          | 1.02E-03          | 205      |          |        |
| 1.00E-02      |                   | 4.45E-01          | 2.56E-04          | 1257     |          |        |
| 5.00E-02      |                   | 4.45E-01          | 2.56E-04          | 1257     |          |        |
| 2.00E-01      |                   | 4.45E-01          | 2.56E-04          | 1257     |          |        |
| 5.00E-01      |                   | 4.45E-01          | 2.56E-04          | 1257     |          |        |
| 1.00E+00      |                   | 4.45E-01          | 2.56E-04          | 1257     |          |        |
|               | NHFV              | Delta<br>NIHSS    | 5.00E-08          | 1.79E-01 | 9.53E-04 | 6      |
|               |                   | 5.00E-06          | 9.22E-01          | 5.10E-06 | 17       |        |



| Base File | Target File |                 | PRSiCe Results    |          |          |      |
|-----------|-------------|-----------------|-------------------|----------|----------|------|
|           | Population  | Phenotype       | P value Threshold | P value  | Variance | SNPs |
|           |             |                 | 1.00E-05          | 6.93E-01 | 8.24E-05 | 20   |
|           |             |                 | 1.00E-03          | 5.68E-02 | 1.92E-03 | 205  |
|           |             |                 | 1.00E-02          | 7.65E-02 | 1.66E-03 | 1257 |
|           |             |                 | 5.00E-02          | 7.65E-02 | 1.66E-03 | 1257 |
|           |             |                 | 2.00E-01          | 7.65E-02 | 1.66E-03 | 1257 |
|           |             |                 | 5.00E-01          | 7.65E-02 | 1.66E-03 | 1257 |
|           |             |                 | 1.00E+00          | 7.65E-02 | 1.66E-03 | 1257 |
|           |             |                 | 5.00E-08          | 1.06E-01 | 1.42E-03 | 6    |
|           |             |                 | 5.00E-06          | 1.86E-01 | 9.52E-04 | 17   |
|           |             |                 | 1.00E-05          | 6.84E-01 | 9.02E-05 | 20   |
|           |             | <b>Baseline</b> | 1.00E-03          | 1.03E-01 | 1.44E-03 | 205  |
|           |             | <b>NIHSS</b>    | 1.00E-02          | 9.25E-01 | 4.80E-06 | 1257 |
|           |             |                 | 5.00E-02          | 9.25E-01 | 4.80E-06 | 1257 |
|           |             |                 | 2.00E-01          | 9.25E-01 | 4.80E-06 | 1257 |
|           |             |                 | 5.00E-01          | 9.25E-01 | 4.80E-06 | 1257 |
|           |             |                 | 1.00E+00          | 9.25E-01 | 4.80E-06 | 1257 |

TE = Trans-Ethnic Population; NHW = Non-Hispanic White Population; NHFW = Non-Hispanic Non-Finnish Population; Nominally significant p values are in bold

**Supplementary Table VI.** GNOVA results for each phenotype and European population

| <b>All Ischemic Stroke Risk - MegaStroke</b> |                           |                    |                                       |                    |
|----------------------------------------------|---------------------------|--------------------|---------------------------------------|--------------------|
|                                              | <b>Non-Hispanic White</b> |                    | <b>Non-Hispanic Non-Finnish White</b> |                    |
|                                              | <b>P Value</b>            | <b>Correlation</b> | <b>P Value</b>                        | <b>Correlation</b> |
| <b>ΔNIHSS</b>                                | 0.078                     | 0.399              | 0.073                                 | 0.350              |
| <b>Baseline NIHSS</b>                        | 0.850                     | NA                 | 0.260                                 | 0.312              |
| <b>Type 2 Diabetes Mellitus - Diagram</b>    |                           |                    |                                       |                    |
| <b>ΔNIHSS</b>                                | 0.061                     | -0.360             | 0.165                                 | -0.243             |
| <b>Baseline NIHSS</b>                        | 0.151                     | NA                 | 0.014                                 | 0.450              |

HTN was not included in the GNOVA analysis due to the small number of SNPS available in the summary statistics

P values and correlation values are corrected for sample overlap

Correlation values on NA indicate that the heritability estimates were negative

## SUPPLEMENTAL FIGURES

**Supplementary Figure I.** Ethnic clustering by Principal Component Analyses (PCA) using HapMap as an anchor

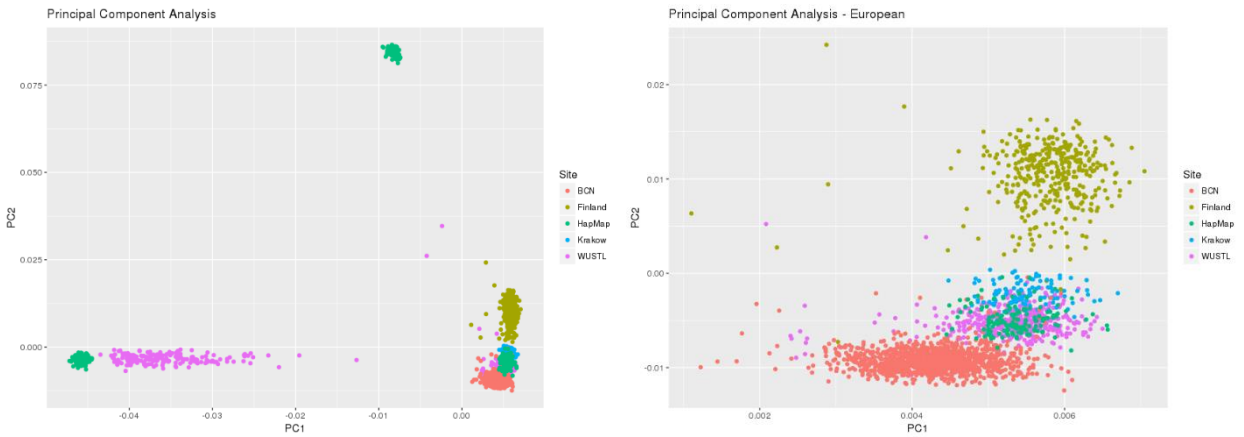

A – Clustering of the multiethnic GENESIS populations by PC1 and PC2

B – Enlargement of the European ancestry GENESIS population as defined by PC1 and PC2

BCN = Barcelona; WUSTL = Washington University in Saint Louis; PC=Principal Components

**Supplementary Figure II.** Distribution of Delta NIHSS in each GENESIS population

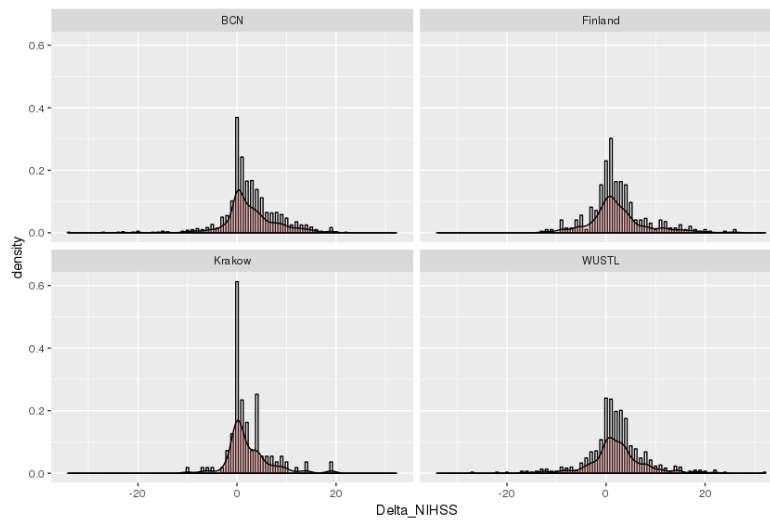

**Supplementary Figure III.** Distribution of Baseline NIHSS in each GENESIS population

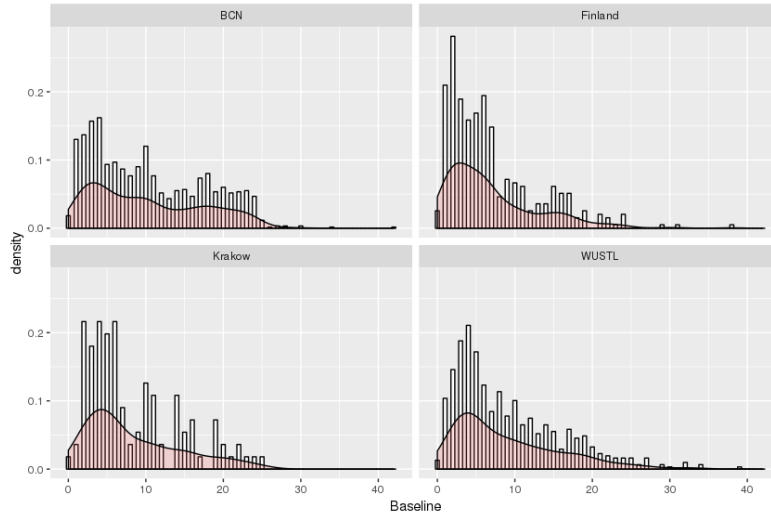

**Supplementary Figure VI. PRSice Bar Plots for the Ischemic Stroke PRS with the three GENISIS phenotypes (Delta and Baseline)**

*Stroke Risk (MegaStroke)*

Trans-ethnic Population

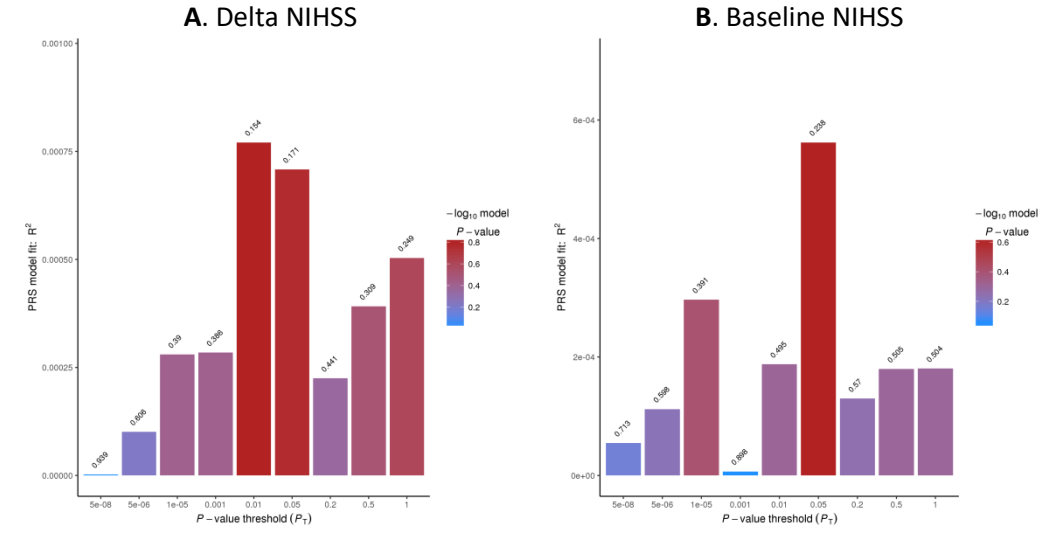

Non-Hispanic White

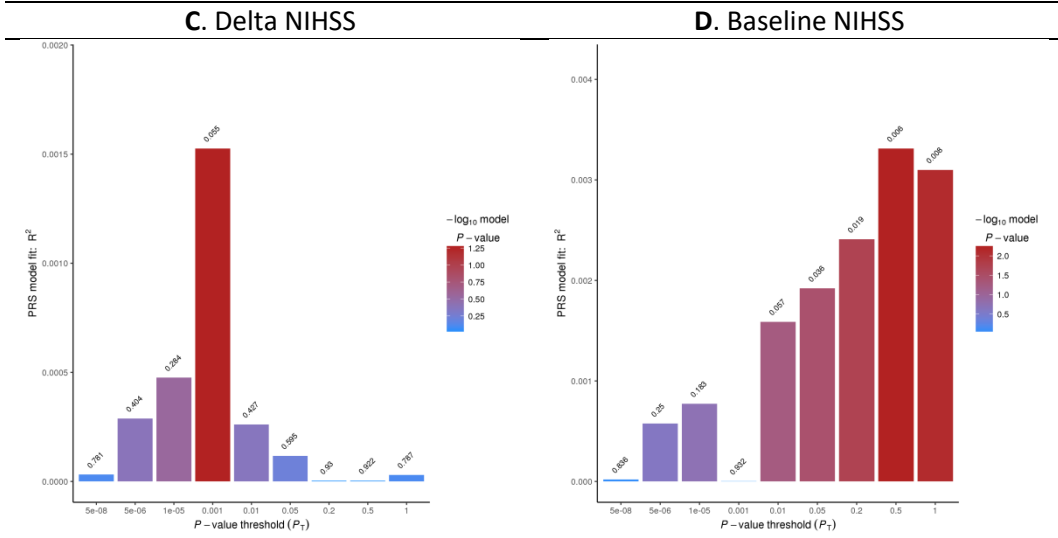

Non-Hispanic Non-Finnish White

E. Delta NIHSS

F. Baseline NIHSS

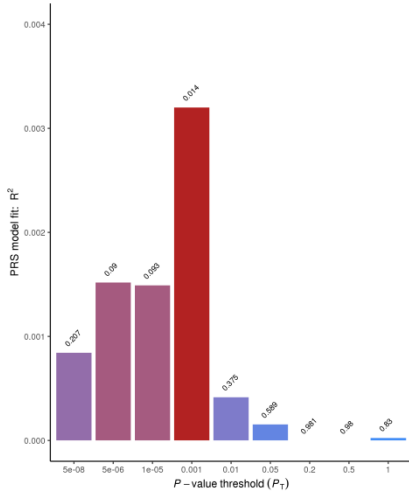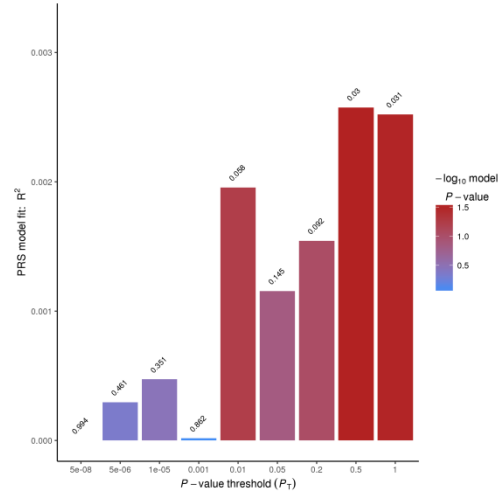

Type 2 Diabetes Mellitus (Diagram)

Non-Hispanic White

G. Delta NIHSS

H. Baseline NIHSS

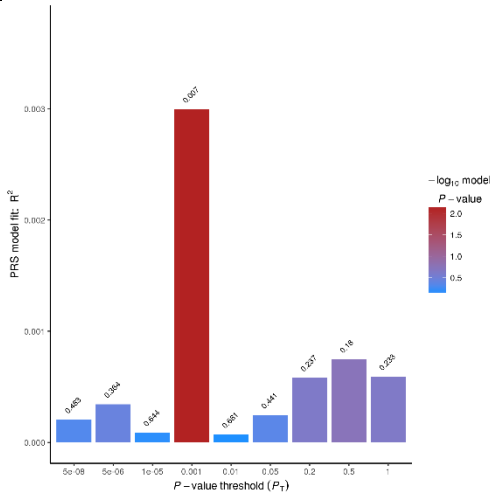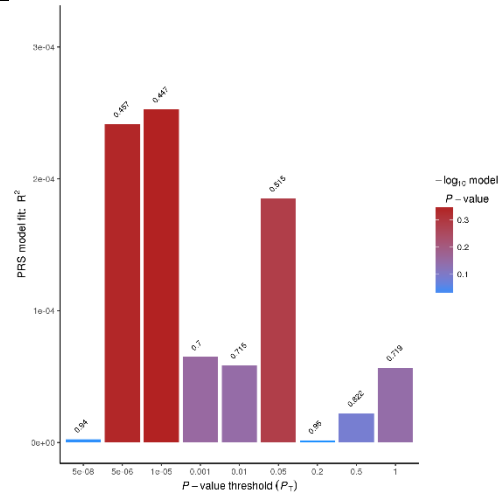

Non-Hispanic Non-Finnish White

I. Delta NIHSS

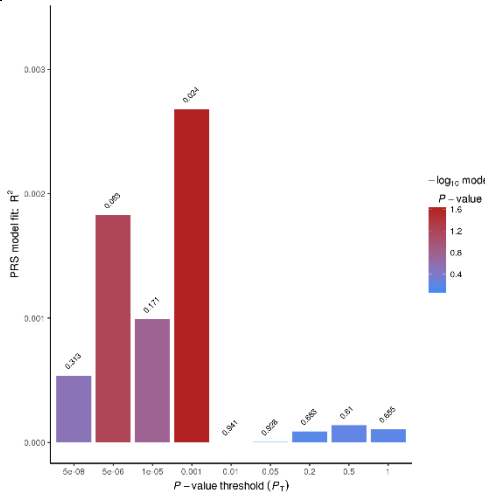

J. Baseline NIHSS

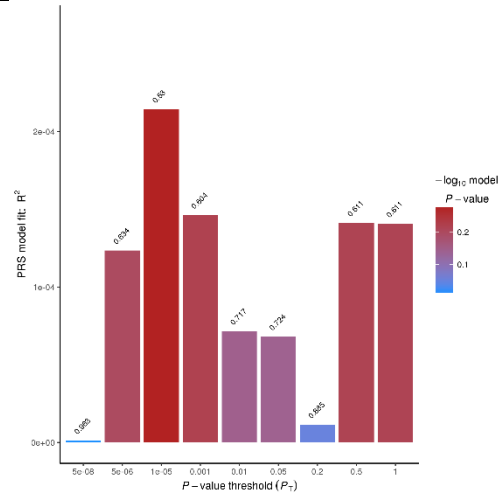

Hypertension (CHARGE)

Non-Hispanic White

K. Delta NIHSS

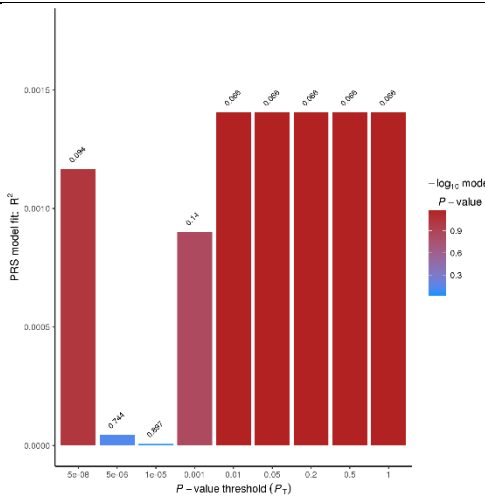

L. Baseline NIHSS

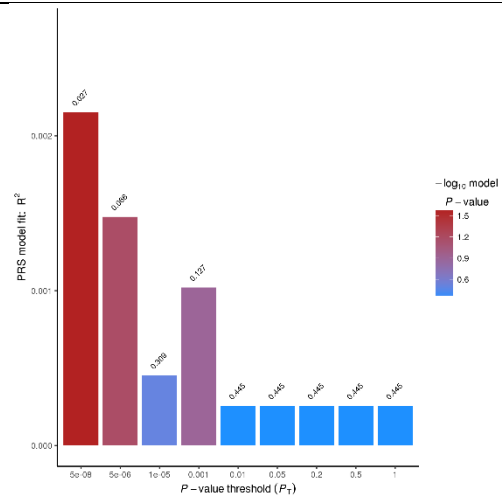

Non-Hispanic Non-Finnish White

M. Delta NIHSS

N. Baseline NIHSS

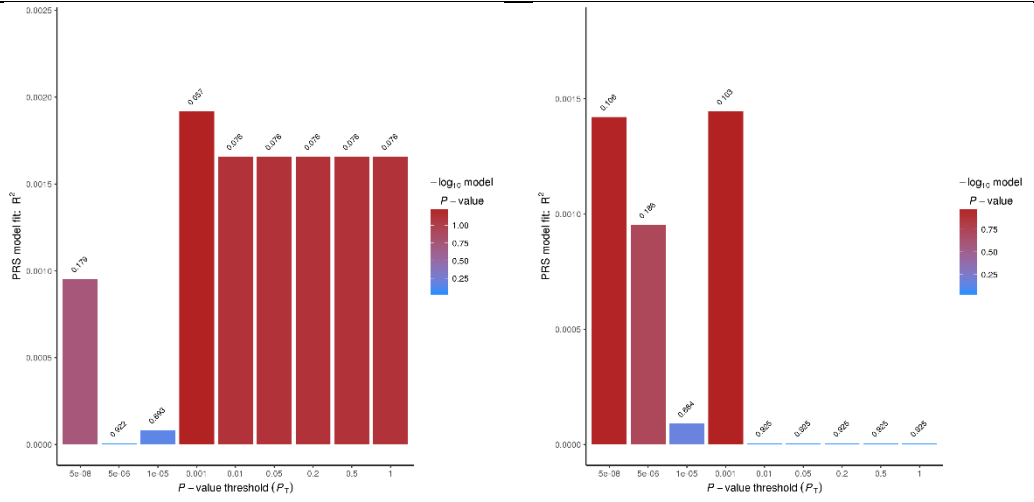



## STUDY GROUP

Rainer Malik <sup>1</sup>, Ganesh Chauhan <sup>2</sup>, Matthew Traylor <sup>3</sup>, Muralidharan Sargurupremraj <sup>4,5</sup>, Yukinori Okada <sup>6,7,8</sup>, Aniket Mishra <sup>4,5</sup>, Loes Rutten-Jacobs <sup>3</sup>, Anne-Katrin Giese <sup>9</sup>, Sander van der Laan <sup>10</sup>, Solveig Gretarsdottir <sup>11</sup>, Christopher D Anderson <sup>12,13,14,14</sup>, Michael Chong <sup>15</sup>, Hieab HH Adams <sup>16,17</sup>, Tetsuro Ago <sup>18</sup>, Peter Almgren <sup>19</sup>, Philippe Amouyel <sup>20,21</sup>, Hakan Ay <sup>22,13</sup>, Traci M Bartz <sup>23</sup>, Oscar R Benavente <sup>24</sup>, Steve Bevan <sup>25</sup>, Giorgio B Boncoraglio <sup>26</sup>, Robert D Brown, Jr. <sup>27</sup>, Adam S Butterworth <sup>28,29</sup>, Caty Carrera <sup>30,31</sup>, Cara L Carty <sup>32,33</sup>, Daniel I Chasman <sup>34,35</sup>, Wei-Min Chen <sup>36</sup>, John W Cole <sup>37</sup>, Adolfo Correa <sup>38</sup>, Ioana Cotlarciuc <sup>39</sup>, Carlos Cruchaga <sup>40,41</sup>, John Danesh <sup>28,42,43,44</sup>, Paul IW de Bakker <sup>45,46</sup>, Anita L DeStefano <sup>47,48</sup>, Marcel den Hoed <sup>49</sup>, Qing Duan <sup>50</sup>, Stefan T Engelter <sup>51,52</sup>, Guido J Falcone <sup>53,54</sup>, Rebecca F Gottesman <sup>55</sup>, Raji P Grewal <sup>56</sup>, Vilmundur Gudnason <sup>57,58</sup>, Stefan Gustafsson <sup>59</sup>, Jeffrey Haessler <sup>60</sup>, Tamara B Harris <sup>61</sup>, Ahamad Hassan <sup>62</sup>, Aki S Havulinna <sup>63,64</sup>, Susan R Heckbert <sup>65</sup>, Elizabeth G Holliday <sup>66,67</sup>, George Howard <sup>68</sup>, Fang-Chi Hsu <sup>69</sup>, Hyacinth I Hyacinth <sup>70</sup>, M Arfan Ikram <sup>16</sup>, Erik Ingelsson <sup>71,72</sup>, Marguerite R Irvin <sup>73</sup>, Xueqiu Jian <sup>74</sup>, Jordi Jiménez-Conde <sup>75</sup>, Julie A Johnson <sup>76,77</sup>, J Wouter Jukema <sup>78</sup>, Masahiro Kanai <sup>6,7,79</sup>, Keith L Keene <sup>80,81</sup>, Brett M Kissela <sup>82</sup>, Dawn O Kleindorfer <sup>82</sup>, Charles Kooperberg <sup>60</sup>, Michiaki Kubo <sup>83</sup>, Leslie A Lange <sup>84</sup>, Carl D Langefeld <sup>85</sup>, Claudia Langenberg <sup>86</sup>, Lenore J Launer <sup>87</sup>, Jin-Moo Lee <sup>88</sup>, Robin Lemmens <sup>89,90</sup>, Didier Leys <sup>91</sup>, Cathryn M Lewis <sup>92,93</sup>, Wei-Yu Lin <sup>28,94</sup>, Arne G Lindgren <sup>95,96</sup>, Erik Lorentzen <sup>97</sup>, Patrik K Magnusson <sup>98</sup>, Jane Maguire <sup>99</sup>, Ani Manichaikul <sup>36</sup>, Patrick F McArdle <sup>100</sup>, James F Meschia <sup>101</sup>, Braxton D Mitchell <sup>100,102</sup>, Thomas H Mosley <sup>103,104</sup>, Michael A Nalls <sup>105,106</sup>, Toshiharu Ninomiya <sup>107</sup>, Martin J O'Donnell <sup>15,108</sup>, Bruce M Psaty <sup>109,110,111,112</sup>, Sara L Pulit <sup>113,45</sup>, Kristiina Rannikmäe <sup>114,115</sup>, Alexander P Reiner <sup>65,116</sup>, Kathryn M Rexrode <sup>117</sup>, Kenneth Rice <sup>118</sup>, Stephen S Rich <sup>36</sup>, Paul M Ridker <sup>34,35</sup>, Natalia S Rost <sup>9,13</sup>, Peter M Rothwell <sup>119</sup>, Jerome I Rotter <sup>120,121</sup>, Tatjana Rundek <sup>122</sup>, Ralph L Sacco <sup>122</sup>, Saori Sakaue <sup>7,123</sup>, Michele M Sale <sup>124</sup>, Veikko Salomaa <sup>63</sup>, Bishwa R Sapkota <sup>125</sup>, Reinhold Schmidt <sup>126</sup>, Carsten O Schmidt <sup>127</sup>, Ulf Schminke <sup>128</sup>, Pankaj Sharma <sup>39</sup>, Agnieszka Slowik <sup>129</sup>, Cathie LM Sudlow <sup>114,115</sup>, Christian Tanislav <sup>130</sup>, Turgut Tatlisumak <sup>131,132</sup>, Kent D Taylor <sup>120,121</sup>, Vincent NS Thijs <sup>133,134</sup>, Gudmar Thorleifsson <sup>11</sup>, Unnur Thorsteinsdottir <sup>11</sup>, Steffen Tiedt <sup>1</sup>, Stella Trompet <sup>135</sup>, Christophe Tzourio <sup>5,136,137</sup>, Cornelia M van Duijn <sup>138,139</sup>, Matthew Walters <sup>140</sup>, Nicholas J Wareham <sup>86</sup>, Sylvia Wassertheil-Smoller <sup>141</sup>, James G Wilson <sup>142</sup>, Kerri L Wiggins <sup>109</sup>, Qiong Yang <sup>47</sup>, Salim Yusuf <sup>15</sup>, Najaf Amin <sup>16</sup>, Hugo S Aparicio <sup>185,48</sup>, Donna K Arnett <sup>186</sup>, John Attia <sup>187</sup>, Alexa S Beiser <sup>47,48</sup>, Claudine Berr <sup>188</sup>, Julie E Buring <sup>34,35</sup>, Mariana Bustamante <sup>189</sup>, Valeria Caso <sup>190</sup>, Yu-Ching Cheng <sup>191</sup>, Seung Hoan Choi <sup>192,48</sup>, Ayesha Chowhan <sup>185,48</sup>, Natalia Cullell <sup>31</sup>, Jean-François Dartigues <sup>193,194</sup>, Hossein Delavaran <sup>95,96</sup>, Pilar Delgado <sup>195</sup>, Marcus Dörr <sup>196,197</sup>, Gunnar Engström <sup>19</sup>, Ian Ford <sup>198</sup>, Wander S Gurpreet <sup>199</sup>, Anders Hamsten <sup>200,201</sup>, Laura Heitsch <sup>202</sup>, Atsushi Hozawa <sup>203</sup>, Laura Ibanez <sup>204</sup>, Andreea Ilinca <sup>95,96</sup>, Martin Ingelsson <sup>205</sup>, Motoki Iwasaki <sup>206</sup>, Rebecca D Jackson <sup>207</sup>, Katarina Jood <sup>208</sup>, Pekka Jousilahti <sup>63</sup>, Sara Kaffashian <sup>4,5</sup>, Lalit Kalra <sup>209</sup>, Masahiro Kamouchi <sup>210</sup>, Takanari Kitazono <sup>211</sup>, Olafur Kjartansson <sup>212</sup>, Manja Kloss <sup>213</sup>, Peter J Koudstaal <sup>214</sup>, Jerzy Krupinski <sup>215</sup>, Daniel L Labovitz <sup>216</sup>, Cathy C Laurie <sup>118</sup>, Christopher R Levi <sup>217</sup>, Linxin Li <sup>218</sup>, Lars Lind <sup>219</sup>, Cecilia M Lindgren <sup>220,221</sup>, Vasileios Lioutas <sup>222,48</sup>, Yong Mei Liu <sup>223</sup>, Oscar L Lopez <sup>224</sup>, Hirata Makoto <sup>225</sup>, Nicolas Martinez-Majander <sup>172</sup>, Koichi Matsuda <sup>225</sup>, Naoko Minegishi <sup>203</sup>, Joan Montaner <sup>226</sup>, Andrew P Morris <sup>227,228</sup>, Elena Muiño <sup>31</sup>, Martina Müller-Nurasyid <sup>229,230,231</sup>, Bo Norrving <sup>95,96</sup>, Soichi Ogishima <sup>203</sup>, Eugenio A Parati <sup>232</sup>, Leema Reddy Peddareddygari <sup>56</sup>, Nancy L Pedersen <sup>98,233</sup>, Joanna Pera <sup>129</sup>, Markus Perola <sup>63,234</sup>, Alessandro Pezzini <sup>235</sup>, Silvana Pileggi <sup>236</sup>, Raquel Rabionet <sup>237</sup>, Iolanda Riba-Llena <sup>30</sup>, Marta Ribasés <sup>238</sup>, Jose R Romero <sup>185,48</sup>, Jaime Roquer <sup>239,240</sup>, Anthony G Rudd <sup>241,242</sup>, Antti-Pekka Sarin <sup>243,244</sup>, Ralhan Sarju <sup>199</sup>, Chloe

Sarnowski<sup>47,48</sup>, Makoto Sasaki<sup>245</sup>, Claudia L Satizabal<sup>185,48</sup>, Mamoru Satoh<sup>245</sup>, Naveed Sattar<sup>246</sup>, Norie Sawada<sup>206</sup>, Gerli Sibolt<sup>172</sup>, Ásgeir Sigurdsson<sup>247</sup>, Albert Smith<sup>248</sup>, Kenji Sobue<sup>245</sup>, Carolina Soriano-Tárraga<sup>240</sup>, Tara Stanne<sup>249</sup>, O Colin Stine<sup>250</sup>, David J Stott<sup>251</sup>, Konstantin Strauch<sup>229,252</sup>, Takako Takai<sup>203</sup>, Hideo Tanaka<sup>253,254</sup>, Kozo Tanno<sup>245</sup>, Alexander Teumer<sup>255</sup>, Liisa Tomppo<sup>172</sup>, Nuria P Torres-Aguila<sup>31</sup>, Emmanuel Touze<sup>256,257</sup>, Shoichiro Tsugane<sup>206</sup>, Andre G Uitterlinden<sup>258</sup>, Einar M Valdimarsson<sup>259</sup>, Sven J van der Lee<sup>16</sup>, Henry Völzke<sup>255</sup>, Kenji Wakai<sup>253</sup>, David Weir<sup>260</sup>, Stephen R Williams<sup>261</sup>, Charles DA Wolfe<sup>241,242</sup>, Quenna Wong<sup>118</sup>, Huichun Xu<sup>191</sup>, Taiki Yamaji<sup>206</sup>, Dharambir K Sanghera<sup>125,169,170</sup>, Olle Melander<sup>19</sup>, Christina Jern<sup>171</sup>, Daniel Strbian<sup>172,173</sup>, Israel Fernandez-Cadenas<sup>31,30</sup>, W T Longstreth, Jr<sup>174,65</sup>, Arndt Rolfs<sup>175</sup>, Jun Hata<sup>107</sup>, Daniel Woo<sup>82</sup>, Jonathan Rosand<sup>12,13,14</sup>, Guillaume Pare<sup>15</sup>, Jemma C Hopewell<sup>176</sup>, Danish Saleheen<sup>177</sup>, Kari Stefansson<sup>11,178</sup>, Bradford B Worrall<sup>179</sup>, Steven J Kittner<sup>37</sup>, Sudha Seshadri<sup>180,48</sup>, Myriam Fornage<sup>74,181</sup>, Hugh S Markus<sup>3</sup>, Joanna MM Howson<sup>28</sup>, Yoichiro Kamatani<sup>6,182</sup>, Stephanie Debette<sup>4,5</sup>, Martin Dichgans<sup>1,183,184</sup>

1 Institute for Stroke and Dementia Research (ISD), University Hospital, LMU Munich, Munich, Germany

2 Centre for Brain Research, Indian Institute of Science, Bangalore, India

3 Stroke Research Group, Division of Clinical Neurosciences, University of Cambridge, UK

4 INSERM U1219 Bordeaux Population Health Research Center, Bordeaux, France

5 University of Bordeaux, Bordeaux, France

6 Laboratory for Statistical Analysis, RIKEN Center for Integrative Medical Sciences, Yokohama, Japan

7 Department of Statistical Genetics, Osaka University Graduate School of Medicine, Osaka, Japan

8 Laboratory of Statistical Immunology, Immunology Frontier Research Center (WPI-IFReC), Osaka University, Suita, Japan.

9 Department of Neurology, Massachusetts General Hospital, Harvard Medical School, Boston, MA, USA

10 Laboratory of Experimental Cardiology, Division of Heart and Lungs, University Medical Center Utrecht, University of Utrecht, Utrecht, Netherlands

11 deCODE genetics/AMGEN inc, Reykjavik, Iceland

12 Center for Genomic Medicine, Massachusetts General Hospital (MGH), Boston, MA, USA

13 J. Philip Kistler Stroke Research Center, Department of Neurology, MGH, Boston, MA, USA

14 Program in Medical and Population Genetics, Broad Institute, Cambridge, MA, USA

15 Population Health Research Institute, McMaster University, Hamilton, Canada

16 Department of Epidemiology, Erasmus University Medical Center, Rotterdam, Netherlands

17 Department of Radiology and Nuclear Medicine, Erasmus University Medical Center, Rotterdam, Netherlands

18 Department of Medicine and Clinical Science, Graduate School of Medical Sciences, Kyushu University, Fukuoka, Japan

19 Department of Clinical Sciences, Lund University, Malmö, Sweden

20 Univ. Lille, Inserm, Institut Pasteur de Lille, LabEx DISTALZ-UMR1167, Risk factors and molecular determinants of aging-related diseases, F-59000 Lille, France

21 Centre Hosp. Univ Lille, Epidemiology and Public Health Department, F-59000 Lille, France

22 AA Martinos Center for Biomedical Imaging, Department of Radiology, Massachusetts General Hospital, Harvard Medical School, Boston, MA, USA

23 Cardiovascular Health Research Unit, Departments of Biostatistics and Medicine, University of Washington, Seattle, WA, USA

24 Division of Neurology, Faculty of Medicine, Brain Research Center, University of British Columbia, Vancouver, Canada

25 School of Life Science, University of Lincoln, Lincoln, UK

26 Department of Cerebrovascular Diseases, Fondazione IRCCS Istituto Neurologico "Carlo Besta", Milano, Italy

27 Department of Neurology, Mayo Clinic Rochester, Rochester, MN, USA

28 MRC/BHF Cardiovascular Epidemiology Unit, Department of Public Health and Primary Care, University of Cambridge, Cambridge, UK

29 The National Institute for Health Research Blood and Transplant Research Unit in Donor Health and Genomics, University of Cambridge, UK

30 Neurovascular Research Laboratory, Vall d'Hebron Institut of Research, Neurology and Medicine Departments-Universitat Autònoma de Barcelona, Vall d'Hebrón Hospital, Barcelona, Spain

31 Stroke Pharmacogenomics and Genetics, Fundacio Docència i Recerca MutuaTerrassa, Terrassa, Spain

32 Children's Research Institute, Children's National Medical Center, Washington, DC, USA

33 Center for Translational Science, George Washington University, Washington, DC, USA

34 Division of Preventive Medicine, Brigham and Women's Hospital, Boston, MA, USA

35 Harvard Medical School, Boston, MA, USA

36 Center for Public Health Genomics, Department of Public Health Sciences, University of Virginia, Charlottesville, VA, USA

37 Department of Neurology, University of Maryland School of Medicine and Baltimore VAMC, Baltimore, MD, USA

38 Departments of Medicine, Pediatrics and Population Health Science, University of Mississippi Medical Center, Jackson, MS, USA

39 Institute of Cardiovascular Research, Royal Holloway University of London, UK & Ashford and St Peters Hospital, Surrey UK

40 Department of Psychiatry, The Hope Center Program on Protein Aggregation and Neurodegeneration (HPAN), Washington University, School of Medicine, St. Louis, MO, USA

41 Department of Developmental Biology, Washington University School of Medicine, St. Louis, MO, USA

42 NIHR Blood and Transplant Research Unit in Donor Health and Genomics, Department of Public Health and Primary Care, University of Cambridge, Cambridge, UK

43 Wellcome Trust Sanger Institute, Wellcome Trust Genome Campus, Hinxton, Cambridge, UK

44 British Heart Foundation, Cambridge Centre of Excellence, Department of Medicine, University of Cambridge, Cambridge, UK

45 Department of Medical Genetics, University Medical Center Utrecht, Utrecht, Netherlands

46 Department of Epidemiology, Julius Center for Health Sciences and Primary Care, University Medical Center Utrecht, Utrecht, Netherlands

47 Boston University School of Public Health, Boston, MA, USA

48 Framingham Heart Study, Framingham, MA, USA

49 Department of Immunology, Genetics and Pathology and Science for Life Laboratory, Uppsala University, Uppsala, Sweden

50 Department of Genetics, University of North Carolina, Chapel Hill, NC, USA

51 Department of Neurology and Stroke Center, Basel University Hospital, Switzerland

52 Neurorehabilitation Unit, University and University Center for Medicine of Aging and Rehabilitation Basel, Felix Platter Hospital, Basel, Switzerland

53 Department of Neurology, Yale University School of Medicine, New Haven, CT, USA

54 Program in Medical and Population Genetics, The Broad Institute of Harvard and MIT, Cambridge, MA, USA

55 Department of Neurology, Johns Hopkins University School of Medicine, Baltimore, MD, USA

56 Neuroscience Institute, SF Medical Center, Trenton, NJ, USA

57 Icelandic Heart Association Research Institute, Kopavogur, Iceland

58 University of Iceland, Faculty of Medicine, Reykjavik, Iceland

59 Department of Medical Sciences, Molecular Epidemiology and Science for Life Laboratory, Uppsala University, Uppsala, Sweden

60 Division of Public Health Sciences, Fred Hutchinson Cancer Research Center, Seattle, WA, USA

61 Laboratory of Epidemiology and Population Science, National Institute on Aging, National Institutes of Health, Bethesda, MD, USA

62 Department of Neurology, Leeds General Infirmary, Leeds Teaching Hospitals NHS Trust, Leeds, UK

63 National Institute for Health and Welfare, Helsinki, Finland

64 FIMM - Institute for Molecular Medicine Finland, Helsinki, Finland

65 Department of Epidemiology, University of Washington, Seattle, WA, USA

66 Public Health Stream, Hunter Medical Research Institute, New Lambton, Australia

67 Faculty of Health and Medicine, University of Newcastle, Newcastle, Australia

68 School of Public Health, University of Alabama at Birmingham, Birmingham, AL, USA

69 Department of Biostatistical Sciences, Wake Forest School of Medicine, Winston-Salem, NC, USA

70 Aflac Cancer and Blood Disorder Center, Department of Pediatrics, Emory University School of Medicine, Atlanta, GA, USA

71 Department of Medicine, Division of Cardiovascular Medicine, Stanford University School of Medicine, CA, USA

72 Department of Medical Sciences, Molecular Epidemiology and Science for Life Laboratory, Uppsala University, Uppsala, Sweden

73 Epidemiology, School of Public Health, University of Alabama at Birmingham, USA

74 Brown Foundation Institute of Molecular Medicine, University of Texas Health Science Center at Houston, Houston, TX, USA

75 Neurovascular Research Group (NEUVAS), Neurology Department, Institut Hospital del Mar d'Investigació Mèdica, Universitat Autònoma de Barcelona, Barcelona, Spain

76 Department of Pharmacotherapy and Translational Research and Center for Pharmacogenomics, University of Florida, College of Pharmacy, Gainesville, FL, USA

77 Division of Cardiovascular Medicine, College of Medicine, University of Florida, Gainesville, FL, USA

78 Department of Cardiology, Leiden University Medical Center, Leiden, the Netherlands

79 Program in Bioinformatics and Integrative Genomics, Harvard Medical School, Boston, MA, USA

- 80 Department of Biology, East Carolina University, Greenville, NC, USA
- 81 Center for Health Disparities, East Carolina University, Greenville, NC, USA
- 82 University of Cincinnati College of Medicine, Cincinnati, OH, USA
- 83 RIKEN Center for Integrative Medical Sciences, Yokohama, Japan
- 84 Department of Medicine, University of Colorado Denver, Anschutz Medical Campus, Aurora, CO, USA
- 85 Center for Public Health Genomics and Department of Biostatistical Sciences, Wake Forest School of Medicine, Winston-Salem, NC, USA
- 86 MRC Epidemiology Unit, University of Cambridge School of Clinical Medicine, Institute of Metabolic Science, Cambridge Biomedical Campus, Cambridge, UK
- 87 Intramural Research Program, National Institute on Aging, National Institutes of Health, Bethesda, MD, USA
- 88 Department of Neurology, Radiology, and Biomedical Engineering, Washington University School of Medicine, St. Louis, MO, USA
- 89 KU Leuven – University of Leuven, Department of Neurosciences, Experimental Neurology, Leuven, Belgium
- 90 VIB Center for Brain & Disease Research, University Hospitals Leuven, Department of Neurology, Leuven, Belgium
- 91 Univ.-Lille, INSERM U 1171. CHU Lille. Lille, France
- 92 Department of Medical and Molecular Genetics, King's College London, London, UK
- 93 SGDP Centre, Institute of Psychiatry, Psychology & Neuroscience, King's College London, London, UK
- 94 Northern Institute for Cancer Research, Paul O'Gorman Building, Newcastle University, Newcastle, UK
- 95 Department of Clinical Sciences Lund, Neurology, Lund University, Lund, Sweden
- 96 Department of Neurology and Rehabilitation Medicine, Skåne University Hospital, Lund, Sweden
- 97 Bioinformatics Core Facility, University of Gothenburg, Gothenburg, Sweden
- 98 Department of Medical Epidemiology and Biostatistics, Karolinska Institutet, Stockholm, Sweden
- 99 University of Technology Sydney, Faculty of Health, Ultimo, Australia
- 100 Department of Medicine, University of Maryland School of Medicine, MD, USA
- 101 Department of Neurology, Mayo Clinic, Jacksonville, FL, USA
- 102 Geriatrics Research and Education Clinical Center, Baltimore Veterans Administration Medical Center, Baltimore, MD, USA
- 103 Division of Geriatrics, School of Medicine, University of Mississippi Medical Center, Jackson, MS, USA
- 104 Memory Impairment and Neurodegenerative Dementia Center, University of Mississippi Medical Center, Jackson, MS, USA
- 105 Laboratory of Neurogenetics, National Institute on Aging, National Institutes of Health, Bethesda, MD, USA
- 106 Data Tecnica International, Glen Echo MD, USA
- 107 Department of Epidemiology and Public Health, Graduate School of Medical Sciences, Kyushu University, Fukuoka, Japan
- 108 Clinical Research Facility, Department of Medicine, NUI Galway, Galway, Ireland
- 109 Cardiovascular Health Research Unit, Department of Medicine, University of Washington, Seattle, WA, USA
- 110 Department of Epidemiology, University of Washington, Seattle, WA

- 111 Department of Health Services, University of Washington, Seattle, WA, USA
- 112 Kaiser Permanente Washington Health Research Institute, Seattle, WA, USA
- 113 Brain Center Rudolf Magnus, Department of Neurology, University Medical Center Utrecht, Utrecht, The Netherlands
- 114 Usher Institute of Population Health Sciences and Informatics, University of Edinburgh, Edinburgh, UK
- 115 Centre for Clinical Brain Sciences, University of Edinburgh, Edinburgh, UK
- 116 Fred Hutchinson Cancer Research Center, University of Washington, Seattle, WA, USA
- 117 Department of Medicine, Brigham and Women's Hospital, Boston, MA, USA
- 118 Department of Biostatistics, University of Washington, Seattle, WA, USA
- 119 Nuffield Department of Clinical Neurosciences, University of Oxford, UK
- 120 Institute for Translational Genomics and Population Sciences, Los Angeles Biomedical Research Institute at Harbor-UCLA Medical Center, Torrance, CA, USA
- 121 Division of Genomic Outcomes, Department of Pediatrics, Harbor-UCLA Medical Center, Torrance, CA, USA
- 122 Department of Neurology, Miller School of Medicine, University of Miami, Miami, FL, USA
- 123 Department of Allergy and Rheumatology, Graduate School of Medicine, the University of Tokyo, Tokyo, Japan
- 124 Center for Public Health Genomics, University of Virginia, Charlottesville, VA, USA
- 125 Department of Pediatrics, College of Medicine, University of Oklahoma Health Sciences Center, Oklahoma City, OK, USA
- 126 Department of Neurology, Medical University of Graz, Graz, Austria
- 127 University Medicine Greifswald, Institute for Community Medicine, SHIP-KEF, Greifswald, Germany
- 128 University Medicine Greifswald, Department of Neurology, Greifswald, Germany
- 129 Department of Neurology, Jagiellonian University, Krakow, Poland
- 130 Department of Neurology, Justus Liebig University, Giessen, Germany
- 131 Department of Clinical Neurosciences/Neurology, Institute of Neuroscience and Physiology, Sahlgrenska Academy at University of Gothenburg, Gothenburg, Sweden
- 132 Sahlgrenska University Hospital, Gothenburg, Sweden
- 133 Stroke Division, Florey Institute of Neuroscience and Mental Health, University of Melbourne, Heidelberg, Australia
- 134 Austin Health, Department of Neurology, Heidelberg, Australia
- 135 Department of Internal Medicine, Section Gerontology and Geriatrics, Leiden University Medical Center, Leiden, the Netherlands
- 136 INSERM U1219, Bordeaux, France
- 137 Department of Public Health, Bordeaux University Hospital, Bordeaux, France
- 138 Genetic Epidemiology Unit, Department of Epidemiology, Erasmus University Medical Center Rotterdam, Netherlands
- 139 Center for Medical Systems Biology, Leiden, Netherlands
- 140 School of Medicine, Dentistry and Nursing at the University of Glasgow, Glasgow, UK
- 141 Department of Epidemiology and Population Health, Albert Einstein College of Medicine, NY, USA
- 142 Department of Physiology and Biophysics, University of Mississippi Medical Center, Jackson, MS, USA
- 143 A full list of members and affiliations appears in the Supplementary Note
- 144 Department of Human Genetics, McGill University, Montreal, Canada

145 Department of Pathophysiology, Institute of Biomedicine and Translation Medicine, University of Tartu, Tartu, Estonia

146 Department of Cardiac Surgery, Tartu University Hospital, Tartu, Estonia

147 Clinical Gene Networks AB, Stockholm, Sweden

148 Department of Genetics and Genomic Sciences, The Icahn Institute for Genomics and Multiscale Biology Icahn School of Medicine at Mount Sinai, New York, NY , USA

149 Department of Pathophysiology, Institute of Biomedicine and Translation Medicine, University of Tartu, Biomeedikum, Tartu, Estonia

150 Integrated Cardio Metabolic Centre, Department of Medicine, Karolinska Institutet, Karolinska Universitetssjukhuset, Huddinge, Sweden.

151 Clinical Gene Networks AB, Stockholm, Sweden

152 Sorbonne Universités, UPMC Univ. Paris 06, INSERM, UMR\_S 1166, Team Genomics & Pathophysiology of Cardiovascular Diseases, Paris, France

153 ICAN Institute for Cardiometabolism and Nutrition, Paris, France

154 Department of Biomedical Engineering, University of Virginia, Charlottesville, VA, USA

155 Group Health Research Institute, Group Health Cooperative, Seattle, WA, USA

156 Seattle Epidemiologic Research and Information Center, VA Office of Research and Development, Seattle, WA, USA

157 Cardiovascular Research Center, Massachusetts General Hospital, Boston, MA, USA

158 Department of Medical Research, Bærum Hospital, Vestre Viken Hospital Trust, Gjøttum, Norway

159 Saw Swee Hock School of Public Health, National University of Singapore and National University Health System, Singapore

160 National Heart and Lung Institute, Imperial College London, London, UK

161 Department of Gene Diagnostics and Therapeutics, Research Institute, National Center for Global Health and Medicine, Tokyo, Japan

162 Department of Epidemiology, Tulane University School of Public Health and Tropical Medicine, New Orleans, LA, USA

163 Department of Cardiology, University Medical Center Groningen, University of Groningen, Netherlands

164 MRC-PHE Centre for Environment and Health, School of Public Health, Department of Epidemiology and Biostatistics, Imperial College London, London, UK

165 Department of Epidemiology and Biostatistics, Imperial College London, London, UK

166 Department of Cardiology, Ealing Hospital NHS Trust, Southall, UK

167 National Heart, Lung and Blood Research Institute, Division of Intramural Research, Population Sciences Branch, Framingham, MA, USA

168 A full list of members and affiliations appears at the end of the manuscript

169 Department of Pharmaceutical Sciences, College of Pharmacy, University of Oklahoma Health Sciences Center, Oklahoma City, OK, USA

170 Oklahoma Center for Neuroscience, Oklahoma City, OK, USA

171 Department of Pathology and Genetics, Institute of Biomedicine, The Sahlgrenska Academy at University of Gothenburg, Gothenburg, Sweden

172 Department of Neurology, Helsinki University Hospital, Helsinki, Finland

173 Clinical Neurosciences, Neurology, University of Helsinki, Helsinki, Finland

174 Department of Neurology, University of Washington, Seattle, WA, USA

175 Albrecht Kossel Institute, University Clinic of Rostock, Rostock, Germany

176 Clinical Trial Service Unit and Epidemiological Studies Unit, Nuffield Department of Population Health, University of Oxford, Oxford, UK

177 Department of Genetics, Perelman School of Medicine, University of Pennsylvania, PA, USA

178 Faculty of Medicine, University of Iceland, Reykjavik, Iceland

179 Departments of Neurology and Public Health Sciences, University of Virginia School of Medicine, Charlottesville, VA, USA

180 Department of Neurology, Boston University School of Medicine, Boston, MA, USA

181 Human Genetics Center, University of Texas Health Science Center at Houston, Houston, TX, USA

182 Center for Genomic Medicine, Kyoto University Graduate School of Medicine, Kyoto, Japan

183 Munich Cluster for Systems Neurology (SyNergy), Munich, Germany

184 German Center for Neurodegenerative Diseases (DZNE), Munich, Germany

185 Boston University School of Medicine, Boston, MA, USA

186 University of Kentucky College of Public Health, Lexington, KY, USA

187 University of Newcastle and Hunter Medical Research Institute, New Lambton, Australia

188 Univ. Montpellier, Inserm, U1061, Montpellier, France

189 Centre for Research in Environmental Epidemiology, Barcelona, Spain

190 Department of Neurology, Università degli Studi di Perugia, Umbria, Italy

191 Department of Medicine, University of Maryland School of Medicine, Baltimore, MD, USA

192 Broad Institute, Cambridge, MA, USA

193 Univ. Bordeaux, Inserm, Bordeaux Population Health Research Center, UMR 1219, Bordeaux, France

194 Bordeaux University Hospital, Department of Neurology, Memory Clinic, Bordeaux, France

195 Neurovascular Research Laboratory. Vall d'Hebron Institut of Research, Neurology and Medicine Departments-Universitat Autònoma de Barcelona. Vall d'Hebrón Hospital, Barcelona, Spain

196 University Medicine Greifswald, Department of Internal Medicine B, Greifswald, Germany

197 DZHK, Greifswald, Germany

198 Robertson Center for Biostatistics, University of Glasgow, Glasgow, UK

199 Hero DMC Heart Institute, Dayanand Medical College & Hospital, Ludhiana, India

200 Atherosclerosis Research Unit, Department of Medicine Solna, Karolinska Institutet, Stockholm, Sweden

201 Karolinska Institutet, Stockholm, Sweden

202 Division of Emergency Medicine, and Department of Neurology, Washington University School of Medicine, St. Louis, MO, USA

203 Tohoku Medical Megabank Organization, Sendai, Japan

204 Department of Psychiatry, Washington University School of Medicine, St. Louis, MO, USA

205 Department of Public Health and Caring Sciences / Geriatrics, Uppsala University, Uppsala, Sweden

206 Epidemiology and Prevention Group, Center for Public Health Sciences, National Cancer Center, Tokyo, Japan

207 Department of Internal Medicine and the Center for Clinical and Translational Science, The Ohio State University, Columbus, OH, USA



208 Institute of Neuroscience and Physiology, the Sahlgrenska Academy at University of Gothenburg, Goteborg, Sweden

209 Department of Basic and Clinical Neurosciences, King's College London, London, UK

210 Department of Health Care Administration and Management, Graduate School of Medical Sciences, Kyushu University, Japan

211 Department of Medicine and Clinical Science, Graduate School of Medical Sciences, Kyushu University, Japan

212 Landspítali National University Hospital, Departments of Neurology & Radiology, Reykjavik, Iceland

213 Department of Neurology, Heidelberg University Hospital, Germany

214 Department of Neurology, Erasmus University Medical Center

215 Hospital Universitari Mutua Terrassa, Terrassa (Barcelona), Spain

216 Albert Einstein College of Medicine, Montefiore Medical Center, New York, NY, USA

217 John Hunter Hospital, Hunter Medical Research Institute and University of Newcastle, Newcastle, NSW, Australia

218 Centre for Prevention of Stroke and Dementia, Nuffield Department of Clinical Neurosciences, University of Oxford, UK

219 Department of Medical Sciences, Uppsala University, Uppsala, Sweden

220 Genetic and Genomic Epidemiology Unit, Wellcome Trust Centre for Human Genetics, University of Oxford, Oxford, UK

221 The Wellcome Trust Centre for Human Genetics, Oxford, UK

222 Beth Israel Deaconess Medical Center, Boston, MA, USA

223 Wake Forest School of Medicine, Wake Forest, NC, USA

224 Department of Neurology, University of Pittsburgh, Pittsburgh, PA, USA

225 BioBank Japan, Laboratory of Clinical Sequencing, Department of Computational biology and medical Sciences, Graduate school of Frontier Sciences, The University of Tokyo, Tokyo, Japan

226 Neurovascular Research Laboratory, Vall d'Hebron Institut of Research, Neurology and Medicine Departments-Universitat Autònoma de Barcelona. Vall d'Hebrón Hospital, Barcelona, Spain

227 Department of Biostatistics, University of Liverpool, Liverpool, UK

228 Wellcome Trust Centre for Human Genetics, University of Oxford, Oxford, UK

229 Institute of Genetic Epidemiology, Helmholtz Zentrum München - German Research Center for Environmental Health, Neuherberg, Germany

230 Department of Medicine I, Ludwig-Maximilians-Universität, Munich, Germany

231 DZHK (German Centre for Cardiovascular Research), partner site Munich Heart Alliance, Munich, Germany

232 Department of Cerebrovascular Diseases, Fondazione IRCCS Istituto Neurologico "Carlo Besta", Milano, Italy

233 Karolinska Institutet, MEB, Stockholm, Sweden

234 University of Tartu, Estonian Genome Center, Tartu, Estonia, Tartu, Estonia

235 Department of Clinical and Experimental Sciences, Neurology Clinic, University of Brescia, Italy

236 Translational Genomics Unit, Department of Oncology, IRCCS Istituto di Ricerche Farmacologiche Mario Negri, Milano, Italy

237 Department of Genetics, Microbiology and Statistics, University of Barcelona, Barcelona, Spain

238 Psychiatric Genetics Unit, Group of Psychiatry, Mental Health and Addictions, Vall d'Hebron Research Institute (VHIR), Universitat Autònoma de Barcelona, Biomedical Network Research Centre on Mental Health (CIBERSAM), Barcelona, Spain

239 Department of Neurology, IMIM-Hospital del Mar, and Universitat Autònoma de Barcelona, Spain

240 IMIM (Hospital del Mar Medical Research Institute), Barcelona, Spain

241 National Institute for Health Research Comprehensive Biomedical Research Centre, Guy's & St. Thomas' NHS Foundation Trust and King's College London, London, UK

242 Division of Health and Social Care Research, King's College London, London, UK

243 FIMM-Institute for Molecular Medicine Finland, Helsinki, Finland

244 THL-National Institute for Health and Welfare, Helsinki, Finland

245 Iwate Tohoku Medical Megabank Organization, Iwate Medical University, Iwate, Japan

246 BHF Glasgow Cardiovascular Research Centre, Faculty of Medicine, Glasgow, UK

247 deCODE Genetics/Amgen, Inc., Reykjavik, Iceland

248 Icelandic Heart Association, Reykjavik, Iceland

249 Institute of Biomedicine, the Sahlgrenska Academy at University of Gothenburg, Goteborg, Sweden

250 Department of Epidemiology, University of Maryland School of Medicine, Baltimore, MD, USA

251 Institute of Cardiovascular and Medical Sciences, Faculty of Medicine, University of Glasgow, Glasgow, UK

252 Chair of Genetic Epidemiology, IBE, Faculty of Medicine, LMU Munich, Germany

253 Division of Epidemiology and Prevention, Aichi Cancer Center Research Institute, Nagoya, Japan

254 Department of Epidemiology, Nagoya University Graduate School of Medicine, Nagoya, Japan

255 University Medicine Greifswald, Institute for Community Medicine, SHIP-KEF, Greifswald, Germany

256 Department of Neurology, Caen University Hospital, Caen, France

257 University of Caen Normandy, Caen, France

258 Department of Internal Medicine, Erasmus University Medical Center, Rotterdam, Netherlands

259 Landspítali University Hospital, Reykjavik, Iceland

260 Survey Research Center, University of Michigan, Ann Arbor, MI, USA

261 University of Virginia Department of Neurology, Charlottesville, VA, USA
